1 **Title:** Polyclonal HIV envelope-specific breast milk antibodies limit founder SHIV acquisition  
2 and cell-associated virus loads in infant rhesus monkeys.

3

4 **Authors:** Jonathon E. Himes<sup>a</sup>, Ria Goswami<sup>a,\*</sup>, Riley J. Mangan<sup>a,\*</sup>, Amit Kumar<sup>a</sup>, Thomas L.  
5 Jeffries Jr.<sup>a</sup>, Joshua A. Eudailey<sup>a</sup>, Holly Heimsath<sup>a</sup>, Quang N. Nguyen<sup>a</sup>, Justin Pollara<sup>a,c</sup>, Celia  
6 LaBranche<sup>a</sup>, Meng Chen<sup>a</sup>, Nathan A. Vandergrift<sup>a</sup>, James W. Peacock<sup>a</sup>, Faith Schiro<sup>f</sup>, Cecily  
7 Midkiff<sup>f</sup>, Guido Ferrari<sup>a,c</sup>, David C. Montefiori<sup>a</sup>, Xavier Alvarez-Hernandez<sup>f</sup>, Pyone Pyone Aye<sup>f</sup>,  
8 Sallie R. Permar<sup>a,b,d,e,#</sup>

9

10 **Affiliations:** Duke Human Vaccine Institute, Duke University School of Medicine, Durham, NC,  
11 USA<sup>a</sup>; Department of Molecular Genetics and Microbiology, Duke University School of  
12 Medicine, Durham, NC, USA<sup>b</sup>; Department of Surgery, Duke University School of Medicine,  
13 Durham, NC, USA<sup>c</sup>; Department of Pediatrics, Duke University School of Medicine, Durham,  
14 NC, USA<sup>d</sup>; Department of Immunology, Duke University School of Medicine, Durham, NC,  
15 USA<sup>e</sup>; Tulane National Primate Research Center, Tulane University, Covington, LA, USA<sup>f</sup>

16

17 **Running Title:** HIV-specific breast milk antibodies and vertical transmission

18

19 #Address correspondence to Sallie R. Permar, [sallie.permar@duke.edu](mailto:sallie.permar@duke.edu).

20 \*Indicates co-second author

21 Word counts: Abstract (226 words), Body (7,488 words)

22

23 **Abstract (226 words)**

24 Vertical HIV-1 transmission via breastfeeding is the predominant contributor to pediatric  
25 infections that are ongoing in this era of highly effective antiretroviral therapy (ART).  
26 Remarkably, only ~10% of infants chronically exposed to the virus via breastfeeding from  
27 untreated HIV-infected mothers become infected, suggesting the presence of naturally protective  
28 factors in breast milk. HIV-specific maternal antibodies are obvious candidates as potential  
29 contributors to this protection. This study assessed the protective capacity of common HIV  
30 envelope-specific non-broadly neutralizing antibodies isolated from breast milk of HIV-infected  
31 women in an infant rhesus monkey (RM), tier 2 SHIV oral challenge model. Prior to oral SHIV  
32 challenge, infant RMs were i.v. infused with either a single weakly-neutralizing monoclonal  
33 antibody (mAb), a tri-mAb cocktail with neutralizing and ADCC functionalities, or an anti-  
34 influenza HA control mAb. Of these groups, the fewest tri-mAb-treated infants developed  
35 plasma viremia (2/6, 3/6, and 6/8 animals viremic in tri-mAb, single-mAb, and control mAb  
36 groups, respectively). Tri-mAb-treated infants demonstrated significantly fewer  
37 transmitted/founder SHIV variants in plasma and decreased peripheral CD4+ T cell proviral  
38 loads at 8 week post-challenge compared to control mAb-treated infants. Abortive infection was  
39 observed as detectable CD4+ T cell provirus in non-viremic control mAb- and single-mAb-, but  
40 not tri-mAb-treated animals. Taken together, these results support the potential viability of  
41 maternal or infant vaccine strategies that elicit non-broadly neutralizing antibodies to prevent  
42 vertical transmission of HIV through breastfeeding.

43

44 **Importance (150 words)**

45 Due to the ongoing global incidence of pediatric HIV-1 infections even with wide antiretroviral  
46 therapy (ART) availability, many that occur via breastfeeding, development of vaccine strategies  
47 capable of preventing vertical HIV transmission through breastfeeding remains an important goal  
48 for achieving an HIV-free generation. Interestingly, in the absence of ART, only ~10% of infants  
49 chronically exposed to HIV orally via breastfeeding become infected, suggesting natural  
50 protective mechanisms in the remaining ~90% of HIV-exposed infants. In this study, we  
51 demonstrate that prophylactic infusion of non-broadly neutralizing human breast milk polyclonal  
52 antibodies with diverse anti-HIV functionalities limited acquisition and/or persistence of  
53 simian/human immunodeficiency virus (SHIV) following oral SHIV challenge of infant rhesus  
54 monkeys compared to controls. These findings imply that non-broadly neutralizing maternal  
55 antibodies may contribute to the inefficient vertical transmission observed in natural  
56 breastfeeding, and vaccine strategies eliciting such responses may prove viable for further  
57 limiting mother-to-child-transmission (MTCT) of HIV through breastfeeding.

58

## 59 **Introduction (1,057 words)**

60 According to the 2016 UNAIDS report, approximately 150,000 pediatric infections occur  
61 annually, accounting for ~10% of new global HIV-1 infections (1, 2). The benefits of  
62 breastfeeding to infant health are well recognized, yet vertical transmission of HIV-1 via  
63 breastfeeding results in nearly half of the annual mother-to-child-transmission (MTCT)  
64 occurrences (3). In resource-limited areas, formula-fed infants exhibit high mortality rates due to  
65 respiratory and diarrheal illness (4, 5) and thus, formula feeding is not a viable strategy to reduce  
66 pediatric HIV transmissions. While administration of antiretroviral therapy (ART) to HIV-1  
67 infected, breastfeeding mothers greatly reduces MTCT rates to below 5% (6), socioeconomic

68 barriers to ART availability and compliance (7, 8), as well as acute maternal infections make it  
69 unlikely that ART-based strategies alone can achieve eradication of pediatric HIV-1 (9-11).  
70 Therefore, developing effective immune-based prevention strategies, such as a maternal or infant  
71 vaccine to protect infants from oral HIV-1 acquisition during breastfeeding, may greatly  
72 contribute to the goal of achieving an HIV-free generation (12).

73         Interestingly, despite chronic mucosal HIV exposure multiple times daily during up to  
74 two years of breastfeeding, only ~10% of nursing infants of untreated HIV-infected mothers will  
75 acquire HIV (12), suggesting the presence of protective factors in breast milk. Thus, a better  
76 understanding of the naturally protective components of breast milk, such as mucosal antibodies,  
77 are of paramount importance in developing effective prophylactic vaccine strategies. Breast milk  
78 contains HIV-1 envelope (Env)-specific antibodies and Env-specific memory B cells (13, 14),  
79 both of which are primarily IgG1 isotype and are otherwise similar in specificity and function to  
80 those identified in blood of chronically infected individuals (15). Yet, the contribution of breast  
81 milk antibodies to the inefficiency of HIV-1 transmission through breastfeeding remains  
82 undefined. Induction or passive infusion of broadly neutralizing antibodies (bNAbs) is an  
83 attractive immunologic strategy for global HIV control (reviewed in (16)) including in the setting  
84 of postnatal HIV transmission (17, 18). Yet, bNAbs only develop naturally in fewer than 20% of  
85 individuals, typically take 2-4 years to develop after infection (19), and have been unable to be  
86 elicited through vaccination. Moreover, bNAbs have not been identified in breast milk (13, 20).  
87 Thus, it is unlikely that naturally acquired bNAbs largely contribute to the protection observed in  
88 the setting of MTCT through breastfeeding.

89         While achieving an HIV-free generation through vaccine development remains a priority,  
90 work to develop an effective treatment leading to remission or cure for infant breakthrough

91 infections is also underway (21). One of the major goals of achieving HIV remission or cure is to  
92 reduce the size of the HIV reservoir to lengthen the time to viral rebound, and to make the host  
93 immune system competent to control residual virus autonomously (22). Currently, the major  
94 barrier for preventing HIV rebound after virologic control is the efficient ability of the virus to  
95 establish latency in resting memory CD4<sup>+</sup> T cells (23, 24). Studies have demonstrated that this  
96 latent viral reservoir is seeded rapidly after SIV infection of rhesus monkeys, even before  
97 viremia is detectable in the plasma, and ART treatment as early as 3 days post-infection is too  
98 late to prevent establishment of the latent reservoir (25). Thus, the window for intervention  
99 before establishment of the viral reservoir is extremely limited and early ART alone may not be  
100 sufficient to attain sustained virologic remission. Post-exposure prophylaxis of single  
101 monoclonal broadly neutralizing antibodies (bNAbs) or a cocktail of potent bNAbs have been  
102 found to have promising effects in suppressing breakthrough infections and reducing the size of  
103 the viral reservoir in established infection (26-28). Important to the setting of infant HIV-1  
104 infection, Hessel et al. have shown that administration of a cocktail of two potent neutralizing  
105 antibodies VRC07-523 and PGT121 at 24 hr post-exposure can reduce the establishment of  
106 permanent viral reservoirs in infant rhesus monkeys (18). Hence, potent neutralizing antibodies  
107 could contribute to reducing the size of viral reservoirs early after establishment, and might be a  
108 synergistic strategy with ART to obtain complete virologic control and delay plasma viral  
109 rebound.

110         Infants orally infected during breastfeeding acquire antibodies present in breast milk  
111 concurrently with the virus. Yet, the in vivo contributions of breast milk-derived antibodies to  
112 the inefficiency of breast milk HIV-1 transmission and viral reservoir establishment remain  
113 largely unexplored. In this study, we sought to define the impact of passively infused and orally

114 dosed breast milk-derived monoclonal antibodies (mAbs) on infant oral virus acquisition and  
115 dissemination in the periphery and lymphoid tissues. MAbs selected for this study were isolated  
116 from breast milk B cells of a cohort of HIV-1-infected Malawian women and were intended to  
117 represent breast milk IgG antibodies with various antiviral functionalities and envelope  
118 specificities (20). RMs were prophylactically passively infused with the maternal breast milk  
119 mAbs to mimic antibody transfer via the placenta, and then orally-exposed to these breast milk-  
120 derived mAbs during repeated oral low dose challenge with the tier 2 chimeric simian/human  
121 immunodeficiency virus, SHIV-1157ipd3N4 (29). Defining the contributions of non-broadly  
122 neutralizing breast milk-derived antibodies to the naturally inefficient transmission of HIV-1  
123 through breastfeeding may inform the design of maternal and infant vaccines aimed at  
124 eliminating postnatal HIV-1 infections and limiting the size of the viral reservoir in the setting of  
125 breakthrough infections.

126

## 127 **Results (3,033 words)**

128 *Selection of maternal breast milk mAbs for in vivo evaluation in infant monkeys and study*  
129 *design.*

130 The HIV Env-specific mAbs isolated from breast milk B cells of lactating, HIV-1-infected  
131 Malawian women (14) and selected for infusion into infant RMs in this study were initially  
132 characterized based on binding specificity, epithelial and dendritic cell-virus binding inhibition,  
133 ADCC, and neutralization against the tier 2 challenge virus in this study, SHIV-1157ipd3N4  
134 (29), as well as neutralization of several tier 1 HIV/SHIV variants (**Figure 1A**) (20). As  
135 previously reported, all of the mAbs isolated from milk B cells were IgG1, did not demonstrate  
136 broadly neutralizing activity, and had similar characteristics to those isolated from peripheral

137 blood HIV-1 Env-specific B cells (14). The infusion mAbs were selected based on their  
138 diversity of functions and specificities; mAb DH378 demonstrated CD4-blocking capability  
139 associated with CD4 binding site (CD4bs)-specificity and mAb DH377 demonstrated linear and  
140 conformational variable loop 3 (V3) binding, both of which are specificities previously  
141 associated with decreased MTCT risk (30, 31), and mAb DH382 demonstrated constant region 1  
142 (C1) specificity and competed with mAb A32-Env binding. All of these anti-HIV mAbs were  
143 able to block epithelial and dendritic cell-virus binding in vitro. Unsurprisingly, the A32-like  
144 mAb DH382 was capable of potent ADCC activity against the tier 2 challenge SHIV-  
145 1157ipd3N4, with a maximum % specific killing of 40.7% and an endpoint concentration of  
146  $<0.04\mu\text{g/mL}$ . Both DH378 and DH377 demonstrated neutralization potency against all tier 1  
147 viruses tested, including SHIV SF162P4, SHIV BaL-P4, MW965.26, and SHIV-1157ipEL-p. Of  
148 the mAbs isolated from maternal milk, only DH378 demonstrated weak neutralization activity  
149 against the tier 2 clade C SHIV challenge virus ( $\text{IC}_{50}=79\mu\text{g/mL}$ ).

150 To assess the degree to which common HIV Env-specific breast milk antibodies  
151 contribute to protection against oral virus acquisition and replication, 20 infant RMs were  
152 divided into 2 anti-HIV-1 Env-specific breast milk mAb treatment groups and a control mAb  
153 treatment group for passive mAb infusion and oral SHIV-1157ipd3N4 challenge (**Figure 1B**). In  
154 this study scheme, systemic passive infusion was intended to simulate placental maternal IgG  
155 transfer, while the oral inoculum was intended to represent oral exposure to the combination of  
156 maternal breast milk HIV Env-specific antibodies and infectious virus. The first treatment group  
157 consisted of 6 animals infused with 10mg/kg of DH378 as this mAb exhibited detectable, albeit  
158 weak neutralization potency against the tier 2 challenge SHIV, as well as dendritic and epithelial  
159 cell-virus binding inhibition. The second group consisted of 6 animals infused with 30mg/kg of

160 an equimolar mixture of mAbs DH378, DH377, and DH382—a mixture containing mAbs that  
161 demonstrate potent ADCC functionality, a variety of binding specificities including a specificity  
162 previously associated with decreased MTCT (V3) (30, 31), dendritic and epithelial cell-virus  
163 binding inhibition, and weak tier 2 neutralization against the challenge SHIV. Anti-influenza HA  
164 mAb CH65 was employed as a control mAb treatment in 8 animals and was infused at a dose of  
165 either 10mg/kg (n=6) or 30mg/kg (n=2) to provide an appropriate dose control for each anti-HIV  
166 mAb infusion group. Of note, control animals from both dose groups were combined for  
167 statistical comparisons. To simulate placental maternal Ab transfer, infants were infused  
168 intravenously with the mAbs 1 hour prior to the first of 9 oral SHIV-1157ipd3N4 challenges (3  
169 times/day for 3 consecutive days). Each oral challenge consisted of 5,000 TCID<sub>50</sub> SHIV-  
170 1157ipd3N4 incubated for 15 minutes on ice with 1µg/mL of the single mAb, or 3µg/mL of the  
171 tri-mAb mixture matching each infusion group, concentrations selected to mimic the levels of  
172 HIV Env-specific antibodies in breast milk (13). The SHIV/mAb mixture was diluted in 10mL  
173 of infant formula prior to infant feeding to simulate breastfeeding. Animals were reinfused with  
174 mAbs matching the initial infusion at 7 days to sustain systemic mAb titers. SHIV-challenged  
175 infant monkeys were then followed for plasma mAb kinetics, systemic cell-free and cell-  
176 associated virus loads, and were necropsied at 8 weeks for assessment of lymphoid and GI tract  
177 tissue viral loads (**Figure 1B**).

178 *Pharmacokinetics of maternal milk HIV-1 mAb infusion of infant RM serum and saliva.*

179 Serum mAb concentrations at longitudinal time points through 8 weeks post SHIV-challenge  
180 were measured by ELISA to determine the kinetics of the mAb persistence. Serum mAb levels  
181 in animals from all treatment groups were largely similar through 2 weeks post-infusion  
182 achieving concentrations of  $9.2 \times 10^4$ - $4.5 \times 10^6$  ng/mL, but some variability arose thereafter as



183 certain animals cleared the infused mAbs more rapidly than others (**Figure 2A; Figure S1**).

184 Additionally, the natural SHIV Env-specific antibody responses likely developed in a subset of  
185 DH378 and tri-mAb treated infants after 28 days, as the Env-binding IgG response did not  
186 decline to baseline in these infants.

187 Plasma neutralizing antibody (NAb) and ADCC levels were measured in all infused  
188 infant RMs to assess in vivo functionality of the infused treatment mAbs and development of  
189 host humoral responses (**Figure 2B, C**). Predictably, NAb responses against the tier 1 clade C  
190 virus MW965 were high in all DH378- and tri-mAb-treated animals early after mAb infusion,  
191 and the magnitude of the responses declined to undetectable in some animals as early as 6 weeks  
192 post challenge as circulating mAb levels deteriorated (**Figure 2B**). Interestingly, several control  
193 animals began to develop a natural tier 1, MW965 NAb responses as early as 6 weeks post-  
194 challenge. None of the animals in this study exhibited neutralization against either the tier 2  
195 SHIV-1157ipd3N4 challenge virus or the related tier 1 virus SHIV-1157ipEL-p (32) at peak  
196 mAb concentrations or 8 weeks post challenge, which was unsurprising as serum mAb  
197 concentrations never surpassed that of the in vitro IC<sub>50</sub> (**Figure 1A**). Serum ADCC endpoint  
198 titers against SHIV-1157ipd3N4-infected CD4<sup>+</sup> T cells were measured preinfusion, at peak  
199 infusion mAb concentration (1 hour after second infusion), and at 8 weeks post initial infusion  
200 for control and tri-mAb-treated RMs (**Figure 2C**; DH378-treated RMs not tested). As expected,  
201 serum from tri-mAb-treated animals exhibited detectable ADCC function, which deteriorated by  
202 8 weeks post initial infusion. Interestingly, 2/8 control mAb-treated animals, but none of the tri-  
203 mAb-infused infant RMs, developed detectable autologous ADCC-mediating mAbs against the  
204 challenge SHIV strain after infection (8 weeks post initial infusion).

205 Saliva mAb concentrations were also measured prior to and following oral challenge  
206 (**Figure 2D**). All animals demonstrated detectable mAb levels in saliva at 1 hour post infusion,  
207 which was the time of the first SHIV challenge. Saliva mAb levels peaked around 1 day post  
208 infusion in all animals and only slightly declined by 7 days post initial infusion in most animals.  
209 The tri-mAb-treated animal, LK79, was unique in that it cleared the infused mAb rapidly from  
210 the saliva, demonstrating undetectable mAb treatment levels in saliva by 7 days post initial  
211 infusion, as well as clearance of the infused mAbs after the second infusion by day 28 of the  
212 study.

213 *Effect of maternal milk HIV-1 antibody treatment on SHIV acquisition and plasma viremia in*  
214 *orally challenged infant RMs.*

215 To characterize the effectiveness of the mAb treatments in preventing SHIV acquisition, SHIV  
216 plasma viral RNA loads of orally-challenged infant RMs were measured in longitudinal samples  
217 by qRT-PCR. 6/8 (75%) CH65-treated control animals, 3/6 (50%) DH378-treated animals, and  
218 2/6 (33%) tri-mAb cocktail-treated animals became detectably viremic after 9 oral SHIV  
219 challenges resulting in statistically similar SHIV acquisition rates between controls and each  
220 treatment group (**Figure 3A**; FDR corrected Fisher's exact test; Controls vs. DH378  $p=0.58$ , tri-  
221 mAb cocktail  $p=0.55$ ). Peak and set point viral RNA loads in plasma were largely similar  
222 between CH65-treated control animals (median and range; peak= $6.2 \times 10^6$  copies/mL,  $9.3 \times 10^5$ -  
223  $2.7 \times 10^7$  copies/mL; set point= $4.4 \times 10^5$  copies/mL,  $5.4 \times 10^4$ - $9.5 \times 10^7$  copies/mL) and tri-mAb-  
224 treated animals (median and range; peak= $2.1 \times 10^6$  copies/mL,  $5.3 \times 10^5$ - $3.6 \times 10^6$  copies/mL; set  
225 point= $3.0 \times 10^5$  copies/mL,  $1.2 \times 10^4$ - $5.9 \times 10^5$  copies/mL) when excluding animals with undetectable  
226 viral RNA loads (**Figure 3B**). Although, the tri-mAb cocktail-treated animal LK81 emerged as  
227 an outlier with the lowest plasma peak and set point viral RNA loads observed in a viremic

228 animal from this study (peak= $5.3 \times 10^5$  copies/mL; set point= $1.2 \times 10^4$  copies/mL). Interestingly,  
229 while set point viral RNA loads in plasma were similar between viremic CH65-treated control  
230 animals and viremic DH378-treated animals (median and range; peak= $7.7 \times 10^7$  copies/mL,  
231  $7.4 \times 10^7$ - $1.1 \times 10^8$  copies/mL; set point= $5.1 \times 10^5$  copies/mL,  $3.5 \times 10^5$ - $8.9 \times 10^6$  copies/mL), the peak  
232 viral RNA loads in plasma from viremic DH378-treated animals was significantly higher than  
233 that from viremic controls (**Figure 3B**; FDR-corrected Wilcoxon test; FDR-corrected  $p=0.05$ ).  
234 Of note, DH378-treated animal LI68 died due to unrelated causes (choking event) prior to the 4-  
235 week time point, resulting in insufficient sample for proviral load quantification. Yet, its 2-week  
236 viral RNA load was undetectable and no other viremic animal in the study demonstrated an  
237 initial detectable viral RNA load after 2 weeks, thus, we considered LI68 uninfected. Given the  
238 ranges of peak and set point viral RNA loads, MHC typing was conducted on all animals.  
239 Several animals possessed MHC alleles highly (Mamu-A001, Mamu-B017) or weakly (Mamu-  
240 A002, Mamu-B047) associated with low set point viral loads and/or longer survival lengths  
241 (**Table S1**) (33-40). However, these protective alleles were not more common in any single  
242 treatment group (67% for control mAb-, and tri-mAb-treated animals, 80% for DH378 mAb-  
243 treated animals). Additionally, all groups also contained animals with the Mamu-A004 allele,  
244 which is associated with increased set point viral loads (41). Interestingly, all viremic, DH378  
245 mAb-treated animals possessed this allele, which could contribute to the significantly higher  
246 plasma viral loads observed in these animals (**Figure 3B**).

247 To assess the development of virus-specific antibodies and seroconversion after infection,  
248 anti-HIV gp41 antibody titers in serum were measured against HIV Env gp41. As the infusion  
249 mAbs were gp120-specific, detection of gp41-specific binding in longitudinal serum represented  
250 the host antibody response. All but one animal with detectable plasma viral RNA developed

251 strong anti-gp41 antibody responses by 4 weeks post-challenge (**Figure 3C**). Control mAb-  
252 treated animal LL15, who failed to develop a gp41-directed antibody response, sustained the  
253 highest week 8 viral loads and the greatest PBMC CD4<sup>+</sup> T cell depletion observed in this study  
254 (**Figure S2**). Interestingly, only 1 tri-mAb-treated animal lacking detectable viremia, LM19,  
255 developed a detectable Env gp41-specific antibody response at week 8 post-challenge, but this  
256 response was ~2 logs lower in magnitude than those of the viremic animals and detected at only  
257 the 8 week necropsy time point, suggesting that this may be a cross reactive response.

258 *Cell-associated SHIV load in blood and tissues from breast milk mAb-treated, orally SHIV-*  
259 *challenged infant RMs.*

260 To determine whether the presence of pre-existing HIV-1 Env-specific mAbs impacted the cell-  
261 associated viral load in blood and tissue compartments following oral challenge in mAb-infused  
262 infant RMs, multiple approaches were employed to quantitate SHIV virus load in PBMCs, GI  
263 tract, and lymphoid tissues of SHIV-challenged infant RMs. These approaches included  
264 quantifying tissue mononuclear cell proviral loads, proportions of viral RNA producing T cells,  
265 and tissue-associated infectious virus titers (**Figure 4**). SHIV provirus in CD4<sup>+</sup> T cells isolated  
266 from PBMCs (preinfection, 2 and 8 weeks post-infection), GI, and lymphoid tissues at 8 weeks  
267 post challenge and measured via ddPCR in viremic infants demonstrated widely variable, but  
268 routinely detectable proviral loads ( $10^4$ - $10^7$  gag copies/million CD4<sup>+</sup> T cells) independent of  
269 tissue type or mAb treatment (**Figure 4A**). Interestingly, SHIV provirus was undetectable in  
270 PBMCs or any tissues isolated from tri-mAb-treated animal LK81, which exhibited detectable,  
271 albeit relatively low plasma SHIV RNA loads.

272 The prevalence of viral RNA expressing cells in tissues was measured by in situ  
273 hybridization assays and quantified as the number of viral RNA producing cells per 1,000 CD3<sup>+</sup>

274 T cells (**Figure 4B-C**). The proportion of SHIV RNA transcribing cells was largely similar in  
275 lymphoid and GI tissues from animals in all treatment groups. However, mesenteric lymph node  
276 and spleen from control mAb-treated animal LL15 exhibited a notably higher prevalence of  
277 SHIV RNA positive cells compared to other SHIV-infected infants (**Figure 4B**). Additionally,  
278 extensive SHIV RNA production was observed within, and to a lesser degree surrounding,  
279 Peyer's patches of the small intestine as well as in CD3<sup>+</sup> T cells of lymphoid tissues (**Figure**  
280 **4C**). Interestingly, SHIV RNA detection within the Peyer's patches largely failed to colocalize  
281 with CD3 expression, indicating that virus associated with dendritic cells and other APCs within  
282 these germinal centers contribute to this SHIV RNA detection.

283 To assess the level of cell-associated infectious SHIV within oral-associated lymphoid  
284 and GI tissues at 8 weeks post-challenge, tissue mononuclear cells were isolated, serially diluted,  
285 and cocultured with TZM-bl reporter cells with luminescence output indicating the degree of  
286 infectious SHIV production (**Figure S3**). Tissue-associated infectious virus titer was calculated  
287 as the number of cells required to sustain detectable infection in 50% of the replicates, with the  
288 detection threshold established as 3 standard deviations above the mean luminescence output of  
289 PBMCs from 3 naive RMs (3,019 RLU). Of note, cell number availability was highly variable  
290 between samples, resulting in a range of detection limits (range= $2 \times 10^5$ - $4 \times 10^6$  mononuclear cells)  
291 and number of replicates (2-8 replicates) for the assay. In general, tissue-associated infectious  
292 SHIV titers were similar between treatment groups (**Figure 4D**). However, within each animal  
293 the palatine tonsil exhibited the highest cell-associated infectious titers of any tissue in 4 of 7  
294 infants with sufficient tonsil tissue for the assay. As this assay employed total mononuclear cells  
295 instead of isolated CD4<sup>+</sup> T cells, this observation could be attributed to variability in CD4<sup>+</sup> T  
296 cell proportion of total mononuclear cells between tonsils and other lymphoid tissues. However,

297 flow cytometric analysis revealed that proportions of CD4<sup>+</sup> T cells of total CD45<sup>+</sup> mononuclear  
298 cells were lower in palatine tonsil than other lymphoid tissues (**Figure S4**), indicating a potential  
299 highly infectious tissue-associated virus titer in palatine tonsil. Interestingly, two viremic  
300 animals, CH65-treated animal LH07 and tri-mAb-treated animal LK81, exhibited undetectable  
301 tissue-associated infectious virus titers. Yet, the tissue shipment for LH07 experienced  
302 unexpected delays resulting in prolonged incubation of tissues in culture media prior to cell  
303 isolation, which may have led to inactivation of SHIV-producing cells, whereas LK81 had the  
304 lowest plasma viral load of all viremic animals and undetectable blood cell-associated virus load.

305 Proviral loads, tissue-associated infectious virus titers, and tissue viral RNA levels in  
306 PBMCs (preinfection, 2 and 8 weeks post-infection), GI tract tissues, and lymphoid tissues in  
307 non-viremic, SHIV-challenged infant RMs were also measured to assess the possibilities of  
308 abortive infection or undetectable, low level replication in the non-viremic infant RMs (**Figure**  
309 **5**). Interestingly, several animals with undetectable plasma SHIV RNA loads throughout the  
310 study including DH378-treated animals LG73 and LI46, and CH65-treated animal LH19,  
311 exhibited detectable SHIV proviral DNA loads in various tissues at similar levels to those  
312 measured from animals with detectable plasma SHIV RNA loads (**Figure 5A**). To confirm the  
313 presence of tissue-associated virus in these non-viremic animals, the SHIV proviral envelopes  
314 were amplified by PCR of genomic DNA (gDNA) from submandibular LN CD4<sup>+</sup> T cells of  
315 LH19 and LG73 and sequenced to demonstrate the presence of full-length envelope open reading  
316 frames (**Figure 5B**). One SHIV *env* variant from each animal was cloned and cotransfected in  
317 293T cells with the SG3 $\Delta env$  backbone to generate pseudoviruses in order to assess *env*  
318 functionality of the provirus. Pseudovirus infectious functionality was measured as a tat-  
319 regulated increase in relative luminescence units (RLUs) after incubation with TZM-bl reporter

320 cells. Both pseudoviruses were capable of infecting TZM-bl reporter cells with the LH19 and  
321 LG73 *env* pseudoviruses eliciting luminescence magnitudes of 571,294 RLU and 176,820 RLU,  
322 respectively, which was appreciably higher than that of cell only controls (~500 RLU).

323 Thus, 4 infants, at least 1 from each mAb treatment group, had discordance between the  
324 presence of detectable plasma viral RNA and CD4+ T cell provirus (**Figure S5A**). Provirus was  
325 observed in CD4+ T cells isolated from non-viremic animals LG73, LI46, and LH19.

326 Alternatively, provirus was not detectable in the viremic animal LK81. Interestingly, prior to  
327 correction for multiple comparisons, tri-mAb-treated infants, but not DH378-treated infants,  
328 demonstrated lower magnitude proviral loads in 8 week PBMCs compared to control mAb-  
329 treated animals (Wilcoxon test; raw  $p=0.03$ ; FDR-corrected  $p=0.18$ ). Taken together, 7/8 CH65-  
330 treated control animals, 5/6 DH378-treated animals, and 2/6 tri-mAb cocktail-treated animals  
331 demonstrated either detectable viremia or proviral loads following oral SHIV challenge (**Figure**  
332 **S5B**).

333 To assess whether breast milk HIV Env-specific mAb pretreatment had an impact on the  
334 CD4+ T cell dysfunction in infected infants, a transcriptome profile of CD4+ T cells isolated  
335 from provirus containing lymphoid and GI tissues of infant RMs was also assessed. The genes  
336 included in the analysis were selected for their known involvement in inflammatory processes,  
337 particularly CD4+ T cell activation and exhaustion, and cell death pathways. Clustering analysis  
338 of relative gene RNA expression in CD4+ T cells from various infant RMs and tissues revealed  
339 clustering independent of tissue type, and mAb treatment group, indicating that infection in the  
340 presence of preexisting HIV Env-specific mAb did not affect target cell profiles in infected  
341 infants (**Figure S6**). Tissue and PBMC CD4+ T cell gene transcription profiles did cluster  
342 loosely corresponding to CD4+ T cell proviral loads.

343 *Plasma SHIV variant diversity in mAb-treated and orally SHIV-infected infant RMs*

344 To assess the potential impact of maternal breast milk mAb passive infusion of infants on the  
345 genetic bottleneck of mucosal virus transmission and SHIV *env* diversification by peak viremia  
346 (2 weeks post challenge), single SHIV variants were isolated from infant RM plasma using  
347 single genome amplification (SGA). Of note, the median viral diversity of the SHIV-  
348 1157ipd3N4 challenge virus stock was 0.02% (range=0-0.07%), appreciably lower than the  
349 diversity typically observed in chronically HIV-1-infected humans (>1% diversity). Viral  
350 diversity within each animal was visualized with phylogenetic tree and highlighter plot (**Figure**  
351 **S7**). Distinct SHIV transmitted/founder (T/F) variants present in plasma isolated at peak viremia  
352 (2 weeks post challenge) were enumerated using previously established criteria (42), which  
353 required that a genotypically distinct variant contain 2 novel mutations (to minimize the  
354 possibility of recombination yielding false results), and that these mutations be observed in at  
355 least 2 SGAs (to minimize the effects of PCR-related mutation). This process demonstrated a  
356 similar number of distinct SHIV variants in plasma at peak viremia between control mAb-treated  
357 RMs (**Table 1**; n=8; median variants isolated=2.5; range=0-4) and DH378 mAb-treated animals  
358 (n=6; median variants isolated=0.5; range=0-2; Wilcoxon test; raw p=0.16; FDR-corrected  
359 p=0.26). However, prior to correction for multiple comparisons, plasma SHIV diversity at peak  
360 viremia was lower in tri-mAb-treated RMs (n=6; median variants isolated=0; range=0-1;  
361 Wilcoxon test; raw p=0.05; FDR-corrected p=0.18), indicating a possible sieve effect of the tri-  
362 mAb treatment on oral SHIV acquisition. When considering SHIV *env* amplicons from all RMs  
363 in a single tree rooted to the SHIV-1157ipd3N4 challenge virus *env*, the tri-mAb-treated RMs  
364 LK72 and LK81 are more homogenous compared to the other 2 infusion groups (**Figure S8**).

365



366 **Discussion (2,168 words)**

367 Despite multiple times daily chronic oral exposure to HIV for up to 2 years, only ~10% of  
368 breastfeeding infants of untreated HIV-infected mothers acquire HIV (12). Furthermore,  
369 postnatally HIV-infected infants demonstrate slower disease progression compared to in utero or  
370 peripartum infected infants (43). Therefore, a better understanding of the naturally protective  
371 components in breast milk of HIV-infected mothers, including breast milk-derived antibodies,  
372 could aid in the development of effective vaccination strategies aimed at reducing MTCT and  
373 other modes of HIV acquisition. Passively infused bNAbs have been shown to protect orally  
374 challenged infant RMs from virus acquisition when provided prophylactically (17) or even 1 day  
375 post challenge (18). Yet bNAbs only develop naturally in a subset of infected individuals years  
376 after infection and have yet to be elicited by vaccination. The protective effects of maternal  
377 breast milk mAbs that lack neutralization breadth remains uncertain. Thus, we sought to probe  
378 the protective capabilities of several non-broadly neutralizing breast milk mAbs previously  
379 isolated from a cohort of HIV-infected Malawian women in an infant RM passive infusion and  
380 oral SHIV challenge model. The three maternal breast milk mAbs selected for inclusion in this  
381 study were intended to represent mAbs exhibiting various anti-HIV functionalities (ADCC, tier 1  
382 and weak tier 2 neutralization, dendritic cell-virus binding inhibition, epithelial cell-virus binding  
383 inhibition) and HIV Env specificities (C1, V3, CD4-blocking). The treatment groups in this  
384 study were designed to assess whether a CD4-blocking mAb with tier 1 and weak autologous tier  
385 2 neutralization could contribute to protection (DH378 mAb treatment group), or if polyclonal  
386 anti-viral functionalities also played an important role (tri-mAb treatment group).

387 The study scheme sought to model infant exposure to oral virus as would occur through  
388 breastfeeding via an HIV-infected mother. Therefore, we orally challenged animals 3 times

389 daily for 3 days with SHIV premixed with the treatment breast milk mAbs at physiologic anti-  
390 HIV Env breast milk antibody concentrations (13). Additionally, animals were passively infused  
391 with the treatment mAbs prior to challenge to mimic placentally transferred maternal antibodies.  
392 As placentally transferred IgG would result in systemic anti-HIV titers persisting for several  
393 months postpartum, we re-infused animals 1 week after the first infusion to sustain systemic  
394 mAb titers. Of note, our use of the breast milk mAbs for the passive infusions as opposed to  
395 systemically-isolated maternal mAbs is a limitation of this model. However, HIV Env-specific  
396 mAbs isolated from milk B cells only appear distinct from those in blood in their enrichment of  
397 IgG1 isotype (14). Importantly, all animals demonstrated detectable mAb levels in saliva at 1  
398 hour after the first mAb infusion, which was the time of the first SHIV challenge, indicating that  
399 the treatment mAbs were present at mucosal sites to mediate their potentially protective  
400 functions. Interestingly, animals from all treatment groups exhibited variable clearance of the  
401 treatment mAbs (**Figure 2**). While this finding is unlikely to alter conclusions regarding the  
402 protective capabilities of these treatments, disparities in mAb concentrations late in the study  
403 could convolute our assessments of the impact of these mAbs on post-infection SHIV viral loads  
404 in tissues at 8 weeks post challenge.

405 As expected, serum from groups treated with mAbs DH377 and/or DH378 exhibited  
406 neutralization against MW965 and serum from groups treated with mAb DH382 exhibited  
407 ADCC against the challenge SHIV. The lack of SHIV-1157ipd3N4 neutralization by DH378-  
408 infused animals was expected as mAb levels of DH378 did not reach the IC<sub>50</sub> for SHIV-  
409 1157ipd3N4 neutralization (79µg/mL), given the limitation of the infusion volume in infant  
410 RMs. Several viremic animals treated with the control mAb developed natural neutralization  
411 responses against MW965 by week 8, and an ADCC response against the challenge SHIV in 2 of

412 8 animals. Yet, viremic animals from both anti-HIV mAb-treated groups failed to exhibit  
413 adaptive ADCC responses at week 8. This lack of development of ADCC functionality in serum  
414 at week 8 post challenge in the anti-HIV mAb-treated animals could indicate mAb blocking of  
415 immunogenic epitopes, but further exploration is warranted to better understand this result.

416 Plasma viremia was assessed to classify the extent to which anti-HIV breast milk mAb-  
417 treated animals were protected from SHIV acquisition relative to the control mAb CH65-infused  
418 animals. Importantly, as maternal mAbs employed in this study did not coevolve with the  
419 challenge virus, which would be the case in the natural setting of HIV-1 infection, the observed  
420 protection facilitated by these mAbs may underrepresent that which would occur against a truly  
421 autologous viral strain. Both the DH378-treatment and the tri-mAb cocktail treatment groups  
422 had a lower number of viremic animals compared to the control mAb-infused group (6/8 animals  
423 viremic), with only 3/6 and 2/6 animals becoming viremic over the 8 week study, respectively  
424 (**Figure 3**). Yet, this potential partial protection mediated by breast milk mAbs lacked statistical  
425 significance when compared to controls, likely due to low animal numbers. Interestingly, peak  
426 VLs, but not set point VLs, in DH378-treated, viremic animals were significantly higher than  
427 that of control animals and this difference was not attributable to more protective MHC-types in  
428 the control animals (**Table S1**). Perhaps this effect on plasma VL was due to selection of more  
429 fit variants or antibody-enhanced viral infection of target cells in CD4-blocking mAb-infused  
430 infants. However, peak VLs in the tri-mAb-treated, viremic animals were not elevated over  
431 those in control animals, indicating that a cocktail of functionally diverse mAbs may negate the  
432 potential effects of a single mAb on viral replication. Additionally, tri-mAb-treated animal  
433 LK81 demonstrated the lowest peak and set point viral loads observed in any viremic animal  
434 (**Figure 3**). This enhanced viral control post-acquisition may be attributable to the animal MHC

435 background with 2 protective MHC alleles, Mamu-A001 and Mamu-B047a, that are both  
436 associated with lower set point viral loads (33-40). However, other viremic animals sharing the  
437 Mamu-A001 allele, including LK72 with 2 protective alleles, did not demonstrate notably lower  
438 viral loads (**Table S1**). Furthermore, these MHC alleles are not associated with decreased peak  
439 viral loads (33, 39).

440 Tissue-associated virus was characterized in viremic animals at 8 weeks via multiple  
441 approaches to fully characterize the state of the tissue-associated virus load within lymphoid and  
442 GI tract tissues (**Figure 4**). The size of the latent reservoir in these infant RMs was not directly  
443 assessed due to limitations of cell numbers and the lack of ART treatment prior to necropsy.  
444 Interestingly, while limited differences in measures of virus-infected cells were observed  
445 between most infant RMs regardless of treatment groups, tri-mAb-treated animal LK81 did not  
446 have detectable proviral loads or tissue mononuclear cell-associated infectious viral titers, and  
447 demonstrated low levels of active viral transcription in only 2 of 5 tissues tested. This finding is  
448 consistent with the low plasma viremia observed in this animal, and may either be due to the  
449 protective MHC alleles, the tri-mAb anti-HIV functionalities, or a combination of these factors.  
450 While our characterizations of tissue-associated virus were otherwise largely similar between  
451 treatment groups, tissue mononuclear cell-associated infectious viral titers indicated that the  
452 tonsillar tissue had heightened infectious SHIV levels compared to other lymphoid and GI  
453 tissues. This result aligns with previous reports indicating the susceptibility of tonsillar tissue as  
454 a portal of HIV entry and amplification (44-49), and further suggests that the tonsils may be a  
455 key anatomical site for strategies seeking to prevent or treat HIV infections, particularly through  
456 the oral route.

457            Interestingly, we observed high proviral loads in a range of tissues from several control  
458 and DH378 mAb-treated non-viremic animals (**Figure 5**). These findings may indicate either  
459 abortive or very low level SHIV infection. Generation of pseudoviruses containing 2 proviral  
460 envelope genes (*env*) isolated from these animals demonstrated that they were capable of  
461 infection in vitro, suggesting that the provirus envelope genes were functional. However, the  
462 viability of the full length provirus was not assessed due to inability to amplify the full genome.  
463 Notably, detectable provirus was not observed in CD4+ T cells isolated from any tissues of all  
464 non-viremic, tri-mAb-treated animals. This finding may indicate that the tri-mAb cocktail  
465 successfully prevented or eliminated even abortive infection in these animals. Alternatively, Liu  
466 *et al.* recently demonstrated that passive bNAbs mediating complete protection from  
467 intravaginal SHIV challenge in RMs did not prevent initial virus acquisition and proliferation in  
468 distal tissues, but rather that the bNAbs successfully cleared this infection by around 10 days post-  
469 challenge (50). Thus, perhaps the various anti-SHIV functionalities mediated by the tri-mAb  
470 treatment in this study similarly cleared the initial infection of distal tissues. To determine  
471 whether the tri-mAb treatment prevented initial SHIV acquisition in these animals or mediated  
472 clearance of SHIV in distal tissues, additional work characterizing the viral populations present  
473 in distal lymphoid tissues at various early time points post-challenge is necessary. Regardless of  
474 the mechanism leading to uninfected distal tissues, we speculate that the ADCC-mediating mAb,  
475 DH382, may have played a pivotal role since the DH378 mAb treatment alone failed to similarly  
476 limit tissue-associated proviral loads. This speculation is supported by previous reports of an  
477 association between ADCC functionality of milk antibodies and diminished vertical transmission  
478 rates (51) and infant mortality after infection (52) in humans.

479           The SHIV diversity at peak viremia in infant RMs was measured to assess the capability  
480 of these maternal breast milk mAbs to limit the number of variants transmitted across the  
481 mucosa, transmitted/founders (T/F), and/or early SHIV diversification after oral challenge  
482 (**Table 1**). The fewer distinct SHIV variants isolated from tri-mAb-treated animals compared to  
483 control mAb-treated animals indicates that this cocktail of maternal breast milk mAbs  
484 successfully limited the number of T/F variants capable of establishing sustainable infection in  
485 infant RMs. Furthermore, the double protective MHC alleles in the tri-mAb-treated animals is  
486 unlikely to contribute to this trend of fewer transmitted SHIV variants, as these alleles have been  
487 associated with lower set point VLs and slowed disease progression, but not protection from  
488 virus acquisition. As DH378 mAb-treated infant RMs exhibited similar numbers of SHIV  
489 plasma variants compared to control mAb-treated animals, again the combination of distinct  
490 antibody functions is likely important for reducing SHIV variant transmission.

491           In conclusion, polyclonal non-broadly neutralizing maternal breast milk mAbs were  
492 capable of limiting oral virus acquisition in this infant RM model, potentially through inhibition  
493 of initial variant acquisition at mucosal sites or through rapid viral clearance in the tissues. A  
494 combination of mAbs with diverse Env binding epitopes, and neutralization and ADCC  
495 functionalities, appeared effective at lowering the number of T/F SHIV variants, and potentially  
496 SHIV levels in circulating CD4<sup>+</sup> T cells and tissues in SHIV-challenged infant RMs. Moreover,  
497 this treatment had no association with high peak plasma VLs following breakthrough infection,  
498 as was observed with a single weakly-neutralizing mAb treatment. Additional work  
499 characterizing the state of lymphoid and GI tissues during early acute infection in the setting of  
500 non-broadly neutralizing mAbs could elucidate the exact mechanisms of protection from  
501 acquisition and/or rapid viral clearance mediated by these antibodies, which would further

502 contribute to vaccine design approaches. While bNAbs have been repeatedly shown to be highly  
503 effective both prophylactically and therapeutically, they have also proved challenging to elicit  
504 through vaccination. Ultimately, this study confirms that even non-broadly neutralizing maternal  
505 antibodies, particularly with diverse functions, contribute to the highly inefficient infant virus  
506 transmission via breastfeeding. A better understanding of the mechanism of this protection as  
507 well as other maternal and/or infant factors that contribute to the relative protection of infants in  
508 the setting of breastfeeding may lead to more effective pediatric HIV therapeutic and  
509 prophylactic vaccine design strategies.

510

## 511 **Materials and Methods (1,493 words)**

512 More detailed description of experimental methods provided in Supplemental Methods.

### 513 *Study Animals and Specimen Collection*

514 Twenty infant rhesus macaques (RM; 1-2 weeks old) were IV infused with either 10mg/kg anti-  
515 HIV Env gp120 monoclonal antibody (mAb) DH378 (n=6), 10mg/kg anti-influenza HA mAb  
516 CH65 (n=6), 30mg/kg  $\alpha$ -HA mAb CH65 (n=2), or 30mg/kg of a tri-mAb cocktail composed of  
517 stoichiometric equivalents of 3 anti-HIV Env gp120 mAbs - DH377, DH378, and DH382 (n=6) -  
518 one hour prior to the first oral SHIV challenge. Animals were subjected to 3 oral challenges per  
519 day for 3 consecutive days consisting of 5,000 TCID<sub>50</sub> SHIV-1157ipd3N4 (NIH AIDS Reagent  
520 Program) incubated in 1mL of RPMI containing 1 $\mu$ g/mL DH378, 1 $\mu$ g/mL CH65 (n=6), 3 $\mu$ g/mL  
521 CH65 (n=2), or 3 $\mu$ g/mL of the tri-mAb cocktail for 15 minutes, followed by dilution in ~10mL  
522 formula feed to simulate oral acquisition via breastfeeding. Animals were re-infused with their  
523 respective antibody infusions one week after the initial infusion. Blood and saliva (via weck cell  
524 sponges) were collected before each infusion, 1 hour after each infusion, 1 day after each

525 infusion, and at weeks 2, 4, 6, and 8 of the study. All animals were necropsied at week 8 of the  
526 study and tissues were collected. Tissues were processed either fresh or after overnight shipping  
527 at 4°C to isolate mononuclear cells for sorting, or tissues were fixed in formalin for in situ  
528 hybridization. Mononuclear cells were isolated by density gradient centrifugation with Ficoll-  
529 Paque (GE Healthcare) for lymph nodes, spleen, blood, and tonsils and with Percoll (Sigma-  
530 Aldrich) for intestinal tissues, as previously described (53).

#### 531 *Production of infusion mAbs*

532 Infusion mAbs were obtained through antigen-specific B cell sorting and Ig variable gene  
533 amplification, as previously described (14), and produced through transient transfection either by  
534 the manufacturer Catalent (DH378; Catalent) or at the Duke Human Vaccine Institute in Expi293  
535 cells (DH377, DH382, CH65), as previously described (54).

#### 536 *HIV-1 Neutralization in TZM-bl Cells*

537 Neutralizing antibody titers were measured by the reduction in Tat-regulated Luc reporter gene  
538 expression in a TZM-bl (NIH AIDS Reagent Program) reporter cell assay, as previously  
539 described (55).

#### 540 *Tissue Mononuclear Cell Viral Coculture*

541 Tissue-associated infectious virus titer was assessed through Tat-regulated Luc-F reporter gene  
542 expression to quantify infection of TZM-bl reporter cells after coculture with serial dilutions of  
543 tissue mononuclear cells isolated from RMs. For quantitative comparison, tissues were tested  
544 with a minimum of 2 replicates to employ the Reed-Meunch method to estimate the tissue-  
545 associated infectious virus titer in units of viable mononuclear cells. The cutoff for infection was  
546 defined as the maximum luminescent readout in RLU obtained from tissue mononuclear cells  
547 isolated from an uninfected animal.



548 *Plasma Viral RNA Load Quantification*

549 Reverse transcriptase quantitative PCR was performed to determine the SHIV-1157ipd3N4 RM  
550 plasma RNA load, as previously described (56).

551 *Mononuclear Cell Provirus Quantification*

552 RM CD4<sup>+</sup> T cell-associated genomic DNA (gDNA) was isolated from various GI and lymphoid  
553 tissues with the QIAamp DNA/RNA extraction kit (Qiagen) and quantified using the Biorad  
554 QX200 droplet digital PCR System according to the manufacturer instructions (Biorad) with  
555 SHIV *gag* specific primers and probe and a commercially available human TERT-specific  
556 reference assay (Biorad). The SHIV proviral load in SHIV copies/million CD4<sup>+</sup> T cells was  
557 calculated by dividing the SHIV DNA copy number by the TERT copy number divided by 2  
558 multiplied by 10<sup>6</sup> cells.

559 *Measurement of virus-specific IgG levels in plasma and saliva*

560 Enzyme-linked immunosorbent assays (ELISA) were performed as previously described (20).  
561 Plasma or saliva samples were serially diluted in 384 well ELISA plates (384 wells; Corning  
562 Life Sciences) coated with gp140 1086c, MN.gp41, Bio-V3.C, or Hemagglutinin (HA Solomon  
563 Islands; Protein Sciences Corporation). Horseradish peroxidase (HRP)-conjugated goat anti-  
564 human IgG (Jackson ImmunoResearch) was used as a secondary antibody followed by detection  
565 with SureBlue Reserve Microwell Substrate (VWR), TMB (3,3',5,5'-tetramethylbenzidine) Stop  
566 Solution (VWR), and 450nm absorbance quantification of individual wells using a Spectramax  
567 Plus spectrophotometer (Molecular Devices). Antibody concentrations in serum and saliva were  
568 identified using purified monoclonal antibody 4-parameter standard curves of DH378, CH65,  
569 7B2 (anti-gp41 IgG1 mAb), or the tri-antibody cocktail ranging from 0 to 300ng/mL with 3-fold  
570 dilutions.

571 To measure A32 blocking, plasma or saliva samples were serially diluted on 1086c  
572 gp120-coated plates prior to incubation with 200-ng/ml biotinylated A32 mAb for one hour.  
573 Inhibition of biotin-A32 binding was detected with streptavidin-HRP at 1:30,000, followed by  
574 detection as described above. A32-blocking antibody concentration in serum was determined  
575 using a 4-parameter standard curve of the tri-antibody cocktail.

#### 576 *Antibody Dependent Cellular-Cytotoxicity*

577 ADCC activity of the purified mAbs and peripheral serum samples was determined by a  
578 luciferase-based cell killing assay as previously described (31, 57). CEM.NKR<sub>CCR5</sub> target cells  
579 (NIH AIDS Reagent Program) were infected with SHIV1157-ipd3N4-IMC encoding a *Renilla*  
580 luciferase reporter gene (58), followed by addition of PBMCs from a healthy HIV-seronegative  
581 donor in wells of a 96-well plate and incubation with serial dilutions of RM serum. ADCC  
582 activity (percent specific killing) was calculated from the change in RLU (ViviRen luciferase  
583 assay; Promega) resulting from the loss of intact target cells in wells containing effector cells,  
584 target cells, and serum or mAb samples compared to amounts in control wells containing target  
585 cells and effector cells alone. ADCC activity is reported as either the maximum percent killing  
586 observed for each sample or the ADCC endpoint titer, which is defined as the last dilution of  
587 serum that intersects the positive cutoff (15% specific killing) after subtraction of the average  
588 non-specific background activity observed for plasma collected prior to infusion of mAb from all  
589 available animals (n=12).

#### 590 *Flow Cytometry*

591 RM PBMCs or tissue mononuclear cells were stained with a panel of fluorochrome-conjugated  
592 antibodies and either phenotyped using an LSRII flow cytometer or bulk sorted into CD4<sup>+</sup> and  
593 CD8<sup>+</sup> T cells using a FACS Aria II cytometer (BD Biosciences). CD4<sup>+</sup> and CD8<sup>+</sup> T cells were

594 positively selected from isolated tissue mononuclear cells by sequential selection of  
595 lymphocytes, FSC and SSC singlets, viable cells, CD45+ leukocytes, CD3+ T cells, and CD4+  
596 vs CD8+ T cells. Data analysis was performed using FlowJo software (TreeStar).

#### 597 *In Situ Hybridization*

598 In situ hybridization for the detection and quantification of SHIV gag RNA in formalin-fixed  
599 tissue blocks was performed using the Affymetrix protocol according to manufacturer instruction  
600 (Affymetrix). Tissue blocks were stained for CD3, DAPI, and SHIV gag RNA and imaged on  
601 slides with a Leica TCS SP8 confocal microscope. The number of SHIV RNA producing cells  
602 was reported as the number of SHIV gag RNA+ cells per 1,000 CD3+ T cells.

#### 603 *CD4+ T cell transcriptome analysis*

604 cDNA was generated from RNA extracted from RM PBMCs and tissue mononuclear cells using  
605 the Fluidigm cDNA Prep Reverse Transcriptase Mix according to the manufacturer's  
606 instructions and preamplified for 20 cycles. Multiplex qPCR was performed on a 48x48 Gene  
607 Expression IFC chip (Biomark) using Fast TaqMan Assays (Biomark) with the TaqMan Fast  
608 Advanced MasterMix (ThermoFisher Scientific) on the Biomark HD Instrument to quantify  
609 RNA levels of 48 genes. Raw data was uploaded into the Fluidigm Real Time PCR Analysis  
610 Software to generate Ct values. Heat map visualization was obtained using the R statistical  
611 language with the gplots visualization package.

#### 612 *Transmitted/Founder Analysis*

613 Transmitted/Founder (T/F) viral sequences in plasma were obtained by single genome  
614 amplification (SGA) through nested reverse transcriptase PCR with subsequent direct amplicon  
615 sequencing, as previously described (59). Sequence alignments and phylogenetic trees were  
616 constructed using clustalW and Highlighter plots were created using the tool at [www.lanl.gov](http://www.lanl.gov).

617 To identify and enumerate T/F variants, the following conditions were applied. Clusters  
618 of related sequences were visually analyzed using phylogenetic trees (Figtree v1.4) and  
619 sequences containing  $<2$  mutations were considered a single variant. Variants containing  $\geq 2$   
620 mutations were considered as progeny of distinct T/F genomes. Potential G-A hypermutations  
621 caused by APOBEC 3G/3F were identified using Hypermut algorithm 2.0 and were reverted for  
622 analysis if there were  $\leq 2$  present. Sequences that had  $>3$  potential APOBEC 3G/3F mutations  
623 were not considered for T/F analysis (Hypermut, <http://www.hiv.lanl.gov>) (60). Sequence  
624 clusters of  $\geq 2$  sequences with  $\geq 2$  shared mutations were considered as distinct T/F variants.

### 625 *Provirus env cloning and pseudovirus preparation*

626 SHIV *env* amplification from genomic DNA (gDNA) extracted from infant RM CD4<sup>+</sup> T cells  
627 was done through bulk nested PCR and cloning into pcDNA3.1/V5-His-Topo (Invitrogen).  
628 Pseudovirus was produced via cotransfection of the SHIV *env* plasmid and a plasmid containing  
629 a subtype B *env* deficient HIV genome (SG3 $\Delta env$ ) in 293T cells (Invitrogen) as previously  
630 described (55). The infectivity of pseudotyped viruses was screened by single round infection of  
631 TZM-bl cells followed by detection of Tat-regulated luminescence with the Bright-Glo luciferase  
632 reagent (Promega) and infectivity was reported as RLU.

### 633 *Statistical Analysis*

634 Statistical tests were performed with SAS v9.4 (SAS Institute). Comparisons of viral load,  
635 proviral load (copies/million cells), and the number of T/F variants in infants from each mAb  
636 treatment group were performed using the exact Wilcoxon test. The proviral load (binary  
637 designation), and the number of infants with detectable SHIV in each mAb treatment group were  
638 compared with Fisher's exact test. False discovery rate (FDR) p-value correction was used to

639 correct for multiple comparisons. A p-value of <0.05 (two-tailed) was considered as significant  
640 for all analyses.

#### 641 **Acknowledgements**

642 We thank Ruth Ruprect and the Dana Farber Cancer Institute for generously permitting the use  
643 of the SHIV-1157ipd3N4 for challenging the animals in this study through the NIH AIDS  
644 reagent Program. We also thank the Duke Human Vaccine Institute Protein Production Facility  
645 for help with mAb production, the Duke University Sequencing and Genomic Technology core  
646 facility for help with the ddPCR and Fluidigm assays, and David O'Connor and Roger Wiseman  
647 at the Wisconsin National Primate Center for performing the MHC-typing. TZM-bl cells and  
648 SG3 $\Delta env$  were provided by John Kappes and Xiaoyun Wu through the NIH AIDS Reagent  
649 Program. This work was funded by HHS | National Institutes of Health (R01AI1063980). The  
650 funders had no role in study design, data collection and analysis, decision to publish, or  
651 preparation of the manuscript.

652

#### 653 **References**

- 654 1. Anonymous. 2016. UNAIDS. Children and HIV: Fact Sheet. July 2016. Available from  
655 ["http://www.unaids.org/sites/default/files/media\\_asset/FactSheet\\_Children\\_en.pdf"](http://www.unaids.org/sites/default/files/media_asset/FactSheet_Children_en.pdf).
- 656 2. Anonymous. 2016. UNAIDS fact sheet. November 2016, Available from  
657 ["http://www.unaids.org/sites/default/files/media\\_asset/UNAIDS\\_FactSheet\\_en.pdf"](http://www.unaids.org/sites/default/files/media_asset/UNAIDS_FactSheet_en.pdf).
- 658 .
- 659 3. Kourtis AP, Butera S, Ibegbu C, Belec L, Duerr A. 2003. Breast milk and HIV-1: vector  
660 of transmission or vehicle of protection? *Lancet Infect Dis* 3:786-93.

- 661 4. Kuhn L, Aldrovandi G. 2010. Survival and health benefits of breastfeeding versus  
662 artificial feeding in infants of HIV-infected women: developing versus developed world.  
663 Clin Perinatol 37:843-62, x.
- 664 5. Anonymous. 1997. American Academy of Pediatrics Work Group on Breastfeeding.  
665 Breastfeeding and the use of human milk. Pediatrics 100:1035–1039.  
666 Available from "<http://dx.doi.org/10.1542/peds.100.6.1035>"  
667 .
- 668 6. Anonymous. 2017. WHO Mother-to-Child Transmission of HIV. 2017. Available from  
669 "<http://www.who.int/hiv/topics/mtct/about/en/>".
- 670 7. Nachega JB, Uthman OA, Anderson J, Peltzer K, Wampold S, Cotton MF, Mills EJ, Ho  
671 YS, Stringer JS, McIntyre JA, Mofenson LM. 2012. Adherence to antiretroviral therapy  
672 during and after pregnancy in low-income, middle-income, and high-income countries: a  
673 systematic review and meta-analysis. AIDS 26:2039-52.
- 674 8. Psaros C, Remmert JE, Bangsberg DR, Safren SA, Smit JA. 2015. Adherence to HIV  
675 care after pregnancy among women in sub-Saharan Africa: falling off the cliff of the  
676 treatment cascade. Curr HIV/AIDS Rep 12:1-5.
- 677 9. Drake AL, Wagner A, Richardson B, John-Stewart G. 2014. Incident HIV during  
678 pregnancy and postpartum and risk of mother-to-child HIV transmission: a systematic  
679 review and meta-analysis. PLoS Med 11:e1001608.
- 680 10. Moodley D, Esterhuizen T, Reddy L, Moodley P, Singh B, Ngaleka L, Govender D.  
681 2011. Incident HIV infection in pregnant and lactating women and its effect on mother-  
682 to-child transmission in South Africa. J Infect Dis 203:1231-4.

- 683 11. Moodley D, Esterhuizen TM, Pather T, Chetty V, Ngaleka L. 2009. High HIV incidence  
684 during pregnancy: compelling reason for repeat HIV testing. *AIDS* 23:1255-9.
- 685 12. Fouda GG, Permar SR. 2014. Immune-based interventions to prevent postnatal HIV-1  
686 transmission. *Trends Microbiol* 22:425-7.
- 687 13. Fouda GG, Yates NL, Pollara J, Shen X, Overman GR, Mahlokozera T, Wilks AB, Kang  
688 HH, Salazar-Gonzalez JF, Salazar MG, Kalilani L, Meshnick SR, Hahn BH, Shaw GM,  
689 Lovingood RV, Denny TN, Haynes B, Letvin NL, Ferrari G, Montefiori DC, Tomaras  
690 GD, Permar SR, Center for HIVAVI. 2011. HIV-specific functional antibody responses  
691 in breast milk mirror those in plasma and are primarily mediated by IgG antibodies. *J*  
692 *Virol* 85:9555-67.
- 693 14. Sacha CR, Vandergrift N, Jeffries TL, Jr., McGuire E, Fouda GG, Liebl B, Marshall DJ,  
694 Gurley TC, Stiegel L, Whitesides JF, Friedman J, Badiabo A, Foulger A, Yates NL,  
695 Tomaras GD, Kepler TB, Liao HX, Haynes BF, Moody MA, Permar SR. 2015.  
696 Restricted isotype, distinct variable gene usage, and high rate of gp120 specificity of  
697 HIV-1 envelope-specific B cells in colostrum compared with those in blood of HIV-1-  
698 infected, lactating African women. *Mucosal Immunol* 8:316-26.
- 699 15. Tuaille E, Valea D, Becquart P, Al Tabaa Y, Meda N, Bollore K, Van de Perre P,  
700 Vendrell JP. 2009. Human milk-derived B cells: a highly activated switched memory cell  
701 population primed to secrete antibodies. *J Immunol* 182:7155-62.
- 702 16. Mascola JR, Haynes BF. 2013. HIV-1 neutralizing antibodies: understanding nature's  
703 pathways. *Immunol Rev* 254:225-44.
- 704 17. Baba TW, Liska V, Hofmann-Lehmann R, Vlasak J, Xu W, Ayehunie S, Cavacini LA,  
705 Posner MR, Katinger H, Stiegler G, Bernacky BJ, Rizvi TA, Schmidt R, Hill LR, Keeling

- 706 ME, Lu Y, Wright JE, Chou TC, Ruprecht RM. 2000. Human neutralizing monoclonal  
707 antibodies of the IgG1 subtype protect against mucosal simian-human immunodeficiency  
708 virus infection. *Nat Med* 6:200-6.
- 709 18. Hessel AJ, Jaworski JP, Epton E, Matsuda K, Pandey S, Kahl C, Reed J, Sutton WF,  
710 Hammond KB, Cheever TA, Barnette PT, Legasse AW, Planer S, Stanton JJ, Pegu A,  
711 Chen X, Wang K, Siess D, Burke D, Park BS, Axthelm MK, Lewis A, Hirsch VM,  
712 Graham BS, Mascola JR, Sacha JB, Haigwood NL. 2016. Early short-term treatment with  
713 neutralizing human monoclonal antibodies halts SHIV infection in infant macaques. *Nat*  
714 *Med* 22:362-8.
- 715 19. Gray ES, Madiga MC, Hermanus T, Moore PL, Wibmer CK, Tumba NL, Werner L,  
716 Mlisana K, Sibeko S, Williamson C, Abdool Karim SS, Morris L. 2011. The  
717 neutralization breadth of HIV-1 develops incrementally over four years and is associated  
718 with CD4+ T cell decline and high viral load during acute infection. *J Virol* 85:4828-40.
- 719 20. Jeffries TL, Jr., Sacha CR, Pollara J, Himes J, Jaeger FH, Dennison SM, McGuire E,  
720 Kunz E, Eudailey JA, Trama AM, LaBranche C, Fouda GG, Wiehe K, Montefiori DC,  
721 Haynes BF, Liao HX, Ferrari G, Alam SM, Moody MA, Permar SR. 2016. The function  
722 and affinity maturation of HIV-1 gp120-specific monoclonal antibodies derived from  
723 colostrum B cells. *Mucosal Immunol* 9:414-27.
- 724 21. Martin AR, Siliciano RF. 2016. Progress Toward HIV Eradication: Case Reports, Current  
725 Efforts, and the Challenges Associated with Cure. *Annu Rev Med* 67:215-28.
- 726 22. Cillo AR, Mellors JW. 2016. Which therapeutic strategy will achieve a cure for HIV-1?  
727 *Curr Opin Virol* 18:14-9.



- 728 23. Chun TW, Carruth L, Finzi D, Shen X, DiGiuseppe JA, Taylor H, Hermankova M,  
729 Chadwick K, Margolick J, Quinn TC, Kuo YH, Brookmeyer R, Zeiger MA, Barditch-  
730 Crovo P, Siliciano RF. 1997. Quantification of latent tissue reservoirs and total body viral  
731 load in HIV-1 infection. *Nature* 387:183-8.
- 732 24. Chun TW, Finzi D, Margolick J, Chadwick K, Schwartz D, Siliciano RF. 1995. In vivo  
733 fate of HIV-1-infected T cells: quantitative analysis of the transition to stable latency. *Nat*  
734 *Med* 1:1284-90.
- 735 25. Whitney JB, Hill AL, Sanisetty S, Penaloza-MacMaster P, Liu J, Shetty M, Parenteau L,  
736 Cabral C, Shields J, Blackmore S, Smith JY, Brinkman AL, Peter LE, Mathew SI, Smith  
737 KM, Borducchi EN, Rosenbloom DI, Lewis MG, Hattersley J, Li B, Hesselgesser J,  
738 Geleziunas R, Robb ML, Kim JH, Michael NL, Barouch DH. 2014. Rapid seeding of the  
739 viral reservoir prior to SIV viraemia in rhesus monkeys. *Nature* 512:74-7.
- 740 26. Shingai M, Nishimura Y, Klein F, Mouquet H, Donau OK, Plishka R, Buckler-White A,  
741 Seaman M, Piatak M, Jr., Lifson JD, Dimitrov DS, Nussenzweig MC, Martin MA. 2013.  
742 Antibody-mediated immunotherapy of macaques chronically infected with SHIV  
743 suppresses viraemia. *Nature* 503:277-80.
- 744 27. Ferrantelli F, Hofmann-Lehmann R, Rasmussen RA, Wang T, Xu W, Li PL, Montefiori  
745 DC, Cavacini LA, Katinger H, Stiegler G, Anderson DC, McClure HM, Ruprecht RM.  
746 2003. Post-exposure prophylaxis with human monoclonal antibodies prevented  
747 SHIV89.6P infection or disease in neonatal macaques. *AIDS* 17:301-9.
- 748 28. Barouch DH, Whitney JB, Moldt B, Klein F, Oliveira TY, Liu J, Stephenson KE, Chang  
749 HW, Shekhar K, Gupta S, Nkolola JP, Seaman MS, Smith KM, Borducchi EN, Cabral C,  
750 Smith JY, Blackmore S, Sanisetty S, Perry JR, Beck M, Lewis MG, Rinaldi W,

- 751 Chakraborty AK, Poignard P, Nussenzweig MC, Burton DR. 2013. Therapeutic efficacy  
752 of potent neutralizing HIV-1-specific monoclonal antibodies in SHIV-infected rhesus  
753 monkeys. *Nature* 503:224-8.
- 754 29. Song RJ, Chenine AL, Rasmussen RA, Ruprecht CR, Mirshahidi S, Grisson RD, Xu W,  
755 Whitney JB, Goins LM, Ong H, Li PL, Shai-Kobiler E, Wang T, McCann CM, Zhang H,  
756 Wood C, Kankasa C, Secor WE, McClure HM, Strobert E, Else JG, Ruprecht RM. 2006.  
757 Molecularly cloned SHIV-1157ipd3N4: a highly replication- competent, mucosally  
758 transmissible R5 simian-human immunodeficiency virus encoding HIV clade C Env. *J*  
759 *Virol* 80:8729-38.
- 760 30. Martinez DR, Vandergrift N, Douglas AO, McGuire E, Bainbridge J, Nicely NI,  
761 Montefiori DC, Tomaras GD, Fouda GG, Permar SR. 2017. Maternal binding and  
762 neutralizing IgG responses targeting the C terminal region of the V3 loop are predictive  
763 of reduced peripartum HIV-1 transmission risk. *J Virol* doi:10.1128/JVI.02422-16.
- 764 31. Permar SR, Fong Y, Vandergrift N, Fouda GG, Gilbert P, Parks R, Jaeger FH, Pollara J,  
765 Martelli A, Liebl BE, Lloyd K, Yates NL, Overman RG, Shen X, Whitaker K, Chen H,  
766 Pritchett J, Solomon E, Friberg E, Marshall DJ, Whitesides JF, Gurley TC, Von Holle T,  
767 Martinez DR, Cai F, Kumar A, Xia SM, Lu X, Louzao R, Wilkes S, Datta S, Sarzotti-  
768 Kelsoe M, Liao HX, Ferrari G, Alam SM, Montefiori DC, Denny TN, Moody MA,  
769 Tomaras GD, Gao F, Haynes BF. 2015. Maternal HIV-1 envelope-specific antibody  
770 responses and reduced risk of perinatal transmission. *J Clin Invest* 125:2702-6.
- 771 32. Siddappa NB, Watkins JD, Wassermann KJ, Song R, Wang W, Kramer VG, Lakhashe S,  
772 Santosuosso M, Poznansky MC, Novembre FJ, Villinger F, Else JG, Montefiori DC,  
773 Rasmussen RA, Ruprecht RM. 2010. R5 clade C SHIV strains with tier 1 or 2

- 774 neutralization sensitivity: tools to dissect env evolution and to develop AIDS vaccines in  
775 primate models. *PLoS One* 5:e11689.
- 776 33. Loffredo JT, Maxwell J, Qi Y, Glidden CE, Borchardt GJ, Soma T, Bean AT, Beal DR,  
777 Wilson NA, Rehrauer WM, Lifson JD, Carrington M, Watkins DI. 2007. Mamu-B\*08-  
778 positive macaques control simian immunodeficiency virus replication. *J Virol* 81:8827-  
779 32.
- 780 34. Mothe BR, Weinfurter J, Wang C, Rehrauer W, Wilson N, Allen TM, Allison DB,  
781 Watkins DI. 2003. Expression of the major histocompatibility complex class I molecule  
782 Mamu-A\*01 is associated with control of simian immunodeficiency virus SIVmac239  
783 replication. *J Virol* 77:2736-40.
- 784 35. Muhl T, Krawczak M, Ten Haaf P, Hunsmann G, Sauermann U. 2002. MHC class I  
785 alleles influence set-point viral load and survival time in simian immunodeficiency virus-  
786 infected rhesus monkeys. *J Immunol* 169:3438-46.
- 787 36. O'Connor DH, Mothe BR, Weinfurter JT, Fuenger S, Rehrauer WM, Jing P, Rudersdorf  
788 RR, Liebl ME, Krebs K, Vasquez J, Dodds E, Loffredo J, Martin S, McDermott AB,  
789 Allen TM, Wang C, Doxiadis GG, Montefiori DC, Hughes A, Burton DR, Allison DB,  
790 Wolinsky SM, Bontrop R, Picker LJ, Watkins DI. 2003. Major histocompatibility  
791 complex class I alleles associated with slow simian immunodeficiency virus disease  
792 progression bind epitopes recognized by dominant acute-phase cytotoxic-T-lymphocyte  
793 responses. *J Virol* 77:9029-40.
- 794 37. Pal R, Venzon D, Letvin NL, Santra S, Montefiori DC, Miller NR, Trynieszewska E,  
795 Lewis MG, VanCott TC, Hirsch V, Woodward R, Gibson A, Grace M, Dobratz E,  
796 Markham PD, Hel Z, Nacsa J, Klein M, Tartaglia J, Franchini G. 2002. ALVAC-SIV-

- 797 gag-pol-env-based vaccination and macaque major histocompatibility complex class I  
798 (A\*01) delay simian immunodeficiency virus SIVmac-induced immunodeficiency. *J*  
799 *Virol* 76:292-302.
- 800 38. Sauermann U, Siddiqui R, Suh YS, Platzer M, Leuchte N, Meyer H, Matz-Rensing K,  
801 Stoiber H, Nurnberg P, Hunsmann G, Stahl-Hennig C, Krawczak M. 2008. Mhc class I  
802 haplotypes associated with survival time in simian immunodeficiency virus (SIV)-  
803 infected rhesus macaques. *Genes Immun* 9:69-80.
- 804 39. Yant LJ, Friedrich TC, Johnson RC, May GE, Maness NJ, Enz AM, Lifson JD, O'Connor  
805 DH, Carrington M, Watkins DI. 2006. The high-frequency major histocompatibility  
806 complex class I allele Mamu-B\*17 is associated with control of simian  
807 immunodeficiency virus SIVmac239 replication. *J Virol* 80:5074-7.
- 808 40. Zhang ZQ, Fu TM, Casimiro DR, Davies ME, Liang X, Schleif WA, Handt L, Tussey L,  
809 Chen M, Tang A, Wilson KA, Trigona WL, Freed DC, Tan CY, Horton M, Emini EA,  
810 Shiver JW. 2002. Mamu-A\*01 allele-mediated attenuation of disease progression in  
811 simian-human immunodeficiency virus infection. *J Virol* 76:12845-54.
- 812 41. Albrecht C, Malzahn D, Brameier M, Hermes M, Ansari AA, Walter L. 2014.  
813 Progression to AIDS in SIV-Infected Rhesus Macaques is Associated with Distinct KIR  
814 and MHC class I Polymorphisms and NK Cell Dysfunction. *Front Immunol* 5:600.
- 815 42. Santra S, Tomaras GD, Warriar R, Nicely NI, Liao HX, Pollara J, Liu P, Alam SM,  
816 Zhang R, Cocklin SL, Shen X, Duffy R, Xia SM, Schutte RJ, Pemble Iv CW, Dennison  
817 SM, Li H, Chao A, Vidnovic K, Evans A, Klein K, Kumar A, Robinson J, Landucci G,  
818 Forthal DN, Montefiori DC, Kaewkungwal J, Nitayaphan S, Pitisuttithum P, Rerks-  
819 Ngarm S, Robb ML, Michael NL, Kim JH, Soderberg KA, Giorgi EE, Blair L, Korber

- 820 BT, Moog C, Shattock RJ, Letvin NL, Schmitz JE, Moody MA, Gao F, Ferrari G, Shaw  
821 GM, Haynes BF. 2015. Human Non-neutralizing HIV-1 Envelope Monoclonal  
822 Antibodies Limit the Number of Founder Viruses during SHIV Mucosal Infection in  
823 Rhesus Macaques. *PLoS Pathog* 11:e1005042.
- 824 43. Becquet R, Marston M, Dabis F, Moulton LH, Gray G, Coovadia HM, Essex M, Ekouevi  
825 DK, Jackson D, Coutoudis A, Kilewo C, Leroy V, Wiktor SZ, Nduati R, Msellati P,  
826 Zaba B, Ghys PD, Newell ML, Group UCS. 2012. Children who acquire HIV infection  
827 perinatally are at higher risk of early death than those acquiring infection through  
828 breastmilk: a meta-analysis. *PLoS One* 7:e28510.
- 829 44. Baba TW, Trichel AM, An L, Liska V, Martin LN, Murphey-Corb M, Ruprecht RM.  
830 1996. Infection and AIDS in adult macaques after nontraumatic oral exposure to cell-free  
831 SIV. *Science* 272:1486-9.
- 832 45. Frankel SS, Tenner-Racz K, Racz P, Wenig BM, Hansen CH, Heffner D, Nelson AM,  
833 Pope M, Steinman RM. 1997. Active replication of HIV-1 at the lymphoepithelial surface  
834 of the tonsil. *Am J Pathol* 151:89-96.
- 835 46. Frankel SS, Wenig BM, Burke AP, Mannan P, Thompson LD, Abbondanzo SL, Nelson  
836 AM, Pope M, Steinman RM. 1996. Replication of HIV-1 in dendritic cell-derived  
837 syncytia at the mucosal surface of the adenoid. *Science* 272:115-7.
- 838 47. Glushakova S, Baibakov B, Margolis LB, Zimmerberg J. 1995. Infection of human tonsil  
839 histocultures: a model for HIV pathogenesis. *Nat Med* 1:1320-2.
- 840 48. Rinfret A, Latendresse H, Lefebvre R, St-Louis G, Jolicoeur P, Lamarre L. 1991. Human  
841 immunodeficiency virus-infected multinucleated histiocytes in oropharyngeal lymphoid  
842 tissues from two asymptomatic patients. *Am J Pathol* 138:421-6.

- 843 49. Stahl-Hennig C, Steinman RM, Tenner-Racz K, Pope M, Stolte N, Matz-Rensing K,  
844 Grobschupff G, Raschdorff B, Hunsmann G, Racz P. 1999. Rapid infection of oral  
845 mucosal-associated lymphoid tissue with simian immunodeficiency virus. *Science*  
846 285:1261-5.
- 847 50. Liu J, Ghneim K, Sok D, Bosche WJ, Li Y, Chipriano E, Berkemeier B, Oswald K,  
848 Borducchi E, Cabral C, Peter L, Brinkman A, Shetty M, Jimenez J, Mondesir J, Lee B,  
849 Giglio P, Chandrashekar A, Abbink P, Colantonio A, Gittens C, Baker C, Wagner W,  
850 Lewis MG, Li W, Sekaly RP, Lifson JD, Burton DR, Barouch DH. 2016. Antibody-  
851 mediated protection against SHIV challenge includes systemic clearance of distal virus.  
852 *Science* 353:1045-1049.
- 853 51. Mabuka J, Nduati R, Odem-Davis K, Peterson D, Overbaugh J. 2012. HIV-specific  
854 antibodies capable of ADCC are common in breastmilk and are associated with reduced  
855 risk of transmission in women with high viral loads. *PLoS Pathog* 8:e1002739.
- 856 52. Milligan C, Richardson BA, John-Stewart G, Nduati R, Overbaugh J. 2015. Passively  
857 acquired antibody-dependent cellular cytotoxicity (ADCC) activity in HIV-infected  
858 infants is associated with reduced mortality. *Cell Host Microbe* 17:500-6.
- 859 53. Amos JD, Wilks AB, Fouda GG, Smith SD, Colvin L, Mahlokozera T, Ho C, Beck K,  
860 Overman RG, DeMarco CT, Hodge TL, LaBranche CC, Montefiori DC, Denny TN, Liao  
861 HX, Tomaras GD, Moody MA, Permar SR. 2013. Lack of B cell dysfunction is  
862 associated with functional, gp120-dominant antibody responses in breast milk of simian  
863 immunodeficiency virus-infected African green monkeys. *J Virol* 87:11121-34.
- 864 54. Bonsignori M, Kreider EF, Fera D, Meyerhoff RR, Bradley T, Wiehe K, Alam SM,  
865 Aussedat B, Walkowicz WE, Hwang KK, Saunders KO, Zhang R, Gladden MA, Monroe

- 866 A, Kumar A, Xia SM, Cooper M, Louder MK, McKee K, Bailer RT, Pier BW, Jette CA,  
867 Kelsoe G, Williams WB, Morris L, Kappes J, Wagh K, Kamanga G, Cohen MS, Hraber  
868 PT, Montefiori DC, Trama A, Liao HX, Kepler TB, Moody MA, Gao F, Danishefsky SJ,  
869 Mascola JR, Shaw GM, Hahn BH, Harrison SC, Korber BT, Haynes BF. 2017. Staged  
870 induction of HIV-1 glycan-dependent broadly neutralizing antibodies. *Sci Transl Med* 9.
- 871 55. Li M, Gao F, Mascola JR, Stamatatos L, Polonis VR, Koutsoukos M, Voss G, Goepfert  
872 P, Gilbert P, Greene KM, Bilska M, Kothe DL, Salazar-Gonzalez JF, Wei X, Decker JM,  
873 Hahn BH, Montefiori DC. 2005. Human immunodeficiency virus type 1 env clones from  
874 acute and early subtype B infections for standardized assessments of vaccine-elicited  
875 neutralizing antibodies. *J Virol* 79:10108-25.
- 876 56. Wilks AB, Perry JR, Ehlinger EP, Zahn RC, White R, Gauduin MC, Carville A, Seaman  
877 MS, Schmitz JE, Permar SR. 2011. High cell-free virus load and robust autologous  
878 humoral immune responses in breast milk of simian immunodeficiency virus-infected  
879 african green monkeys. *J Virol* 85:9517-26.
- 880 57. Pollara J, McGuire E, Fouda GG, Rountree W, Eudailey J, Overman RG, Seaton KE,  
881 Deal A, Edwards RW, Tegha G, Kamwendo D, Kumwenda J, Nelson JA, Liao HX,  
882 Brinkley C, Denny TN, Ochsenbauer C, Ellington S, King CC, Jamieson DJ, van der  
883 Horst C, Kourtis AP, Tomaras GD, Ferrari G, Permar SR. 2015. Association of HIV-1  
884 Envelope-Specific Breast Milk IgA Responses with Reduced Risk of Postnatal Mother-  
885 to-Child Transmission of HIV-1. *J Virol* 89:9952-61.
- 886 58. Edmonds TG, Ding H, Yuan X, Wei Q, Smith KS, Conway JA, Wiczorek L, Brown B,  
887 Polonis V, West JT, Montefiori DC, Kappes JC, Ochsenbauer C. 2010. Replication

888 competent molecular clones of HIV-1 expressing Renilla luciferase facilitate the analysis  
889 of antibody inhibition in PBMC. *Virology* 408:1-13.

890 59. Keele BF, Li H, Learn GH, Hraber P, Giorgi EE, Grayson T, Sun C, Chen Y, Yeh WW,  
891 Letvin NL, Mascola JR, Nabel GJ, Haynes BF, Bhattacharya T, Perelson AS, Korber BT,  
892 Hahn BH, Shaw GM. 2009. Low-dose rectal inoculation of rhesus macaques by  
893 SIVsmE660 or SIVmac251 recapitulates human mucosal infection by HIV-1. *J Exp Med*  
894 206:1117-34.

895 60. Rose PP, Korber BT. 2000. Detecting hypermutations in viral sequences with an  
896 emphasis on G --> A hypermutation. *Bioinformatics* 16:400-1.

897

898 **Table 1. Diversity of SHIV-1157ipd3N4 variants in serum isolated 1 week post initial oral challenge**

899 **from control mAb-, DH378 mAb-, or tri-mAb-treated infant RMs.**

| Control mAb (Animal ID)          | # of Variants    | SGA Sequences per Animal | DH378 mAb (Animal ID)            | # of Variants    | SGA Sequences per Animal | Tri-mAb (Animal ID)              | # of Variants  | SGA Sequences per Animal |
|----------------------------------|------------------|--------------------------|----------------------------------|------------------|--------------------------|----------------------------------|----------------|--------------------------|
| LI52                             | 4                | 33                       | LG80                             | 2                | 30                       | LK72                             | 1              | 25                       |
| LD65                             | 3                | 36                       | LI59                             | 2                | 18                       | LK81                             | 1              | 32                       |
| LH20                             | 3                | 23                       | LI40                             | 1                | 21                       | LK79                             | 0              | -                        |
| LL15                             | 3                | 27                       | LI46                             | 0                | -                        | LK82                             | 0              | -                        |
| LH07                             | 2                | 16                       | LG73                             | 0                | -                        | LM19                             | 0              | -                        |
| LD77                             | 1                | 42                       | LI68                             | 0                | -                        | LM20                             | 0              | -                        |
| LH19                             | 0                | -                        |                                  |                  |                          |                                  |                |                          |
| LL16                             | 0                | -                        |                                  |                  |                          |                                  |                |                          |
| <b>Median (Range) # Variants</b> | <b>2.5 (0-4)</b> |                          | <b>Median (Range) # Variants</b> | <b>0.5 (0-2)</b> |                          | <b>Median (Range) # Variants</b> | <b>0 (0-1)</b> |                          |

900

## 901 **Figure Legends**

### 902 **Figure 1. Infant RM passive mAb infusion and oral SHIV challenge study design. A)**

903 Functional characterization of maternal breast milk mAbs selected for passive infusion into

904 infant RMs. MAbs were selected based on diverse functionality, including Env binding

905 specificity and ADCC, inhibition of dendritic cell virus transfer, inhibition of epithelial cell-virus



906 binding, and virus neutralization functionalities. **B)** Timeline for passive mAb infusion and  
907 SHIV-1157ipd3N4 challenge of infant RMs. Twenty infant RMs (1-2 weeks old) were  
908 systemically infused with the indicated mAbs and subsequently orally challenged after 1 hour  
909 with 5,000 TCID<sub>50</sub> of the tier 2 SHIV-1157ipd3N4 in formula feed to mimic infant oral viral  
910 exposure during breast feeding. Animals were reinfused 7 days after the first mAb infusion with  
911 the same mAb dose to sustain systemic Ab titers. Animals were necropsied at 8 weeks after  
912 challenge and lymphatic and GI tract tissues were collected.

913 **Figure 2. The kinetics of passively infused mAbs and anti-SHIV Ab function in passively**  
914 **breast milk mAb-infused, SHIV-challenged infant RM serum and saliva.** Concentrations of  
915 infused mAbs in **A)** serum and **D)** saliva from pre-infusion to 8 weeks post infusion are depicted  
916 for control mAb-treated (CH65; red), DH378 mAb-treated (DH378; blue), and tri-mAb-treated  
917 (DH378, DH377, DH382; green) infant RMs. **B)** Neutralizing Ab levels in serum reported as  
918 ID<sub>50</sub> against the tier-1 virus MW965 from pre-infusion to 8 weeks post challenge. **C)** ADCC-  
919 mediating Ab levels in serum reported as endpoint titer against SHIV-1157ipd3N4 at  
920 preinfusion, 1 week (after 2<sup>nd</sup> mAb infusion), and 8 weeks post challenge. Black arrows indicate  
921 systemic mAb infusions at days 0 and 7. ND indicates not detectable.

922 **Figure 3. Plasma viral loads, infection rates, and Env gp41 seroconversion of passively**  
923 **breast milk mAb-infused, SHIV-challenged infant RMs.** **A)** Proportion of viremic RMs with  
924 6/8 control mAb-treated RMs (red), 3/6 DH378 mAb-treated RMs (blue; Fisher's exact test;  
925 FDR-corrected p=0.58), and 2/6 tri-mAb-treated RMs (green; Fisher's exact test; FDR-corrected  
926 p=0.55) demonstrating viremia as defined by a detectable plasma viral RNA load at any tested  
927 time point. **B)** Plasma viral RNA loads in mAb treated, orally SHIV challenged infant RMs. \*  
928 indicates significantly higher 2 week post infection plasma viral RNA loads in DH378 mAb-

929 treated RMs compared to CH65-treated RMs (Wilcoxon test; FDR-corrected  $p=0.05$ ). **C)** Env  
930 gp41-binding serum Ab responses (measured as 7B2 Ab mEq) from preinfusion to 8 weeks post-  
931 infusion in infant RMs. ND indicates not detectable.

932 **Figure 4. Tissue-associated SHIV measures in mononuclear cells isolated from lymphoid**  
933 **and GI tissues of viremic infant RMs 8 weeks post passive breast milk mAb infusion and**  
934 **oral SHIV challenge. A)** CD4<sup>+</sup> T cell proviral DNA loads reported as copy number/million  
935 CD4<sup>+</sup> T cells in lymphoid and GI tissue mononuclear cells and **B)** number of SHIV RNA  
936 producing CD3<sup>+</sup> T cells in lymphoid and GI tissue blocks reported as the number of SHIV Gag  
937 RNA<sup>+</sup> cells per 1,000 CD3<sup>+</sup> T cell were measured for control mAb-treated (red), DH378 mAb-  
938 treated (blue), and tri-mAb-treated RMs (green) through ddPCR and in situ hybridization,  
939 respectively. ND indicates not detectable. **C)** Representative images of stained tissue blocks  
940 demonstrating active SHIV RNA transcription within a Peyer's Patch (LI40 jejunum) and in  
941 CD3<sup>+</sup> T cells in lymphoid tissue (LI40 lingual tonsil) employed to assess the number of SHIV  
942 RNA transcribing cells within lymphoid and GI tissues. Blue, green, and red depict nuclear,  
943 CD3, and SHIV Gag RNA staining, respectively. **D)** Tissue-associated infectious SHIV-  
944 1157ipd3N4 titers measured through tissue mononuclear cell coculture with TZM-bl reporter  
945 cells. Reported titers represent the estimated minimum number of mononuclear cells required to  
946 yield detectable infection (cutoff defined by mononuclear cells from unchallenged RM negative  
947 controls) of the TZM-bl cells in 50% of replicates. The cutoff for The limit of detection varied  
948 for each sample and was determined by mononuclear cell availability. NT indicates untested  
949 samples.

950 **Figure 5. Tissue-associated SHIV DNA in CD4<sup>+</sup> T cells isolated from lymphoid and GI**  
951 **tissues of non-viremic infant RMs 8 weeks post passive breast milk mAb infusion and oral**

952 **SHIV challenge.** **A)** Proviral DNA loads reported as copy number/million CD4+ T cells in  
953 lymphoid and GI tissue mononuclear cells were measured for control mAb-treated (red), DH378  
954 mAb-treated (blue), and tri-mAb-treated RMs (green) through ddPCR. ND indicates not  
955 detectable. **B)** Highlighter plot alignments of 2 amplified SHIV *env* sequences obtained through  
956 SGA of extracted DNA from CD4+ T cells isolated from LH19 and LG73 submandibular lymph  
957 nodes compared to the SHIV-1157ipd3N4 *env* stock sequence. Colored lines indicate nucleotide  
958 mismatches compared to the SHIV stock. These *envs* were cloned and subsequently  
959 incorporated into pseudoviruses with a SG3Δ*env* backbone through co-transfection in 293T cells.  
960 Pseudovirus infectivity was estimated in TZM-bl reporter cells as RLU compared to cell-only  
961 controls (<500 RLU). Pseudoviruses expressing *env* isolated from LH19 and LG73  
962 demonstrated infectious capability with 571,294 RLU and 176,820 RLU magnitudes,  
963 respectively.

964

#### 965 **Supplemental Figure Legends**

#### 966 **Figure S1. Decay of passively infused mAbs in serum of tri-mAb cocktail-treated infant**

967 **RMs.** Concentrations of infused mAbs in serum from pre infusion to 8 weeks post infusion are  
968 depicted for tri-mAb cocktail-treated animals. **A)** 1086C. gp140, **B)** 1086C. V3 peptide, and **C)**  
969 A32-blocking ELISAs were employed to estimate the relative concentrations of DH377 and  
970 DH382 within the tri-mAb cocktail-treated animals over the course of the study. Black arrows  
971 indicate systemic mAb infusions at days 0 and 7. ND indicates not detectable.

972

#### 973 **Figure S2. CD4+ T cell counts in blood of mAb-treated, SHIV-1157ipd3N4 challenged**

974 **infant RMs.** **A)** Absolute and **B)** relative CD4+ T cell counts in blood of mAb-treated and orally

975 SHIV-challenged infant RMs collected longitudinally. Red, blue, and green symbols indicate  
976 control mAb-, DH378-mAb, and tri-mAb-treated animals, respectively.

977

978 **Figure S3. Tissue-associated infectious SHIV levels measured through tissue mononuclear**  
979 **cell coculture with TZM-bl reporter cells.** Mononuclear cells isolated from tissues 8 weeks  
980 after oral SHIV-1157ipd3N4-challenge of control mAb-, DH378 mAb-, and tri-mAb-treated  
981 infant RMs were serially diluted and cocultured with TZM-bl reporter cells for 72hrs, followed  
982 by luminescent detection of tissue-associated SHIV infectivity in relative luminescence units  
983 (RLU). The RLU limit of detection for positive tissue-associated SHIV infection (dashed line)  
984 was defined as 3 standard deviations above the mean maximum RLUs elicited from PBMCs of  
985 unchallenged control RMs (n=3) in the coculture assay.

986

987 **Figure S4. CD4+ T cell proportions in tissues of mAb-treated, SHIV-1157ipd3N4**  
988 **challenged infant RMs.** **A)** Proportion of CD4+ T cells of total T cells and **B)** total CD45+  
989 mononuclear cells in various lymphoid and GI tissues of mAb-treated and orally SHIV-  
990 challenged infant RMs at necropsy (8 weeks post infusion). Red, blue, and green symbols  
991 indicate control mAb-, DH378-mAb, and tri-mAb-treated animals, respectively. Squares  
992 indicate non-viremic animals, while circles indicate viremic animals.

993

994 **Figure S5. Summary of SHIV detection and proportion of animals with detectable cell-free**  
995 **or cell-associated SHIV in breast milk mAb-infused, orally SHIV-challenged infant RMs.**  
996 **A)** Binary indication of detectable plasma SHIV RNA, peripheral CD4+ T cell SHIV provirus,  
997 and tissue CD4+ T cell SHIV provirus detection. For each animal, SHIV detection methods with

998 detectable SHIV in any tested tissue or at any timepoint were indicated with a red “+”, while  
999 those with undetectable values in all tested tissues and at all timepoints were indicated with a  
1000 grey “-”. **B)** Proportion of animals with detectable cell-free or cell-associated SHIV as defined  
1001 by detectable SHIV plasma RNA, SHIV provirus in tissues or PBMCs, tissue mononuclear cell-  
1002 associated infectious SHIV titers, or SHIV RNA-transcribing cells.

1003  
1004 **Figure S6. Heatmap hierarchical clusterings of CD4+ T cell RNA transcription profile in**  
1005 **infant RMs.** Heatmap visualization of a Fluidigm-based multiplex RT-qPCR assay to quantify  
1006 expression of a 27-gene panel selected to represent activation and cell death pathways in  
1007 genomic RNA from FACS-isolated **A)** PBMC and **B)** lymph node CD4+ T cells. A two-  
1008 dimensional hierarchical clustering heatmap was constructed in the R programming language.  
1009 Green represents a high column Ct Z score, or low RNA quantities while red represents low Ct  
1010 values, or high RNA quantities. Cell-associated proviral copies, quantitated by ddPCR as log *gag*  
1011 copies/10<sup>4</sup> CD4+ cells, and animal treatment group are depicted with color-coded bars to the  
1012 right of the clustering heatmap. The proviral load color scale ranges are determined by the rank  
1013 quartile *gag* quantities.

1014  
1015 **Figure S7. Representative phylogenetic trees of SHIV env variants isolated from passively**  
1016 **mAb-infused, SHIV-1157ipd3N4- challenged infant RMs.** Standard SGA techniques were  
1017 used to isolate the SHIV envelope gene from plasma of **A)** control mAb-treated, **B)** DH378  
1018 mAb-treated, and **C)** tri-mAb-treated infant RMs, and amplicons were sequenced. Clustalw and  
1019 the Kimura 2 Parameter (K2P) method were used to align amplicons and construct phylogenetic  
1020 trees rooted at the SHIV-1157ipd3N4 envelope gene (Acc. No. DQ779174), respectively.

1021 Distinct variant clusters (V; indicated by bold lines) within each animal were defined as having  
1022  $\geq 2$  unique mutations that were observed in  $\geq 2$  amplicons.

1023

1024 **Figure S8. Phylogenetic tree analysis of SHIV *env* isolated from passively breastmilk mAb-**

1025 **infused infant RMs 2 weeks after oral SHIV challenge.** Standard SGA techniques were used

1026 to isolate SHIV *env* genes from each animal 2 weeks following oral SHIV challenge and

1027 amplicons were sequenced. Clustalw and Kimura 2 Parameter (K2P) method were used to align

1028 amplicons and construct the phylogenetic tree rooted at the SHIV-1157ipd3N4 stock *env*,

1029 respectively. Amplicons from control mAb-treated, DH378 mAb-treated and tri-mAb-treated

1030 animals are colored red, blue, and green, respectively. The scale bar represents 0.0008

1031 nucleotide mutations per site. The black arrow indicates the SHIV-1157ipd3N4 challenge *env*

1032 sequence. SHIV proviral *env* sequences isolated from CD4+ T cells in LH19 and LG73

1033 submandibular LNs at 8 weeks post infection were included in the tree and are indicated by \*.

1034

## Figures

### Figure 1

| Antibody ID | Treatment Group | Env Specificity | Isotype and Class | ADCC Endpoint Concentration ( $\mu\text{g/mL}$ ) | Inhibition of:          |                         | Neutralization $\text{IC}_{50}$ ( $\mu\text{g/mL}$ ) in TZM-bl cells: |             |          |                 |                 |
|-------------|-----------------|-----------------|-------------------|--------------------------------------------------|-------------------------|-------------------------|-----------------------------------------------------------------------|-------------|----------|-----------------|-----------------|
|             |                 |                 |                   |                                                  | Dendritic Cell Transfer | Epithelial Cell Binding | Tier 1 viruses                                                        |             |          |                 | Tier 2 virus    |
|             |                 |                 |                   |                                                  |                         |                         | SHIV SF162P4                                                          | SHIV BaL-P4 | MW965.26 | SHIV-1157ipEL-p | SHIV-1157ipd3N4 |
| DH378       | mAb and tri-mAb | CD4 blocking    | IgG1              | 0.5                                              | 100%                    | 96%                     | 1.07                                                                  | 6.09        | 0.04     | 13.37           | 79              |
| DH382       | Tri-mAb         | C1, A32-like    | IgG1              | <0.04                                            | Undetectable            | Undetectable            | NT                                                                    | NT          | >25      | NT              |                 |
| DH377       | Tri-mAb         | V3              | IgG1              | Undetectable                                     | 100%                    | 98%                     | 24.21                                                                 | 0.42        | <0.01    | <0.01           | >25             |

3

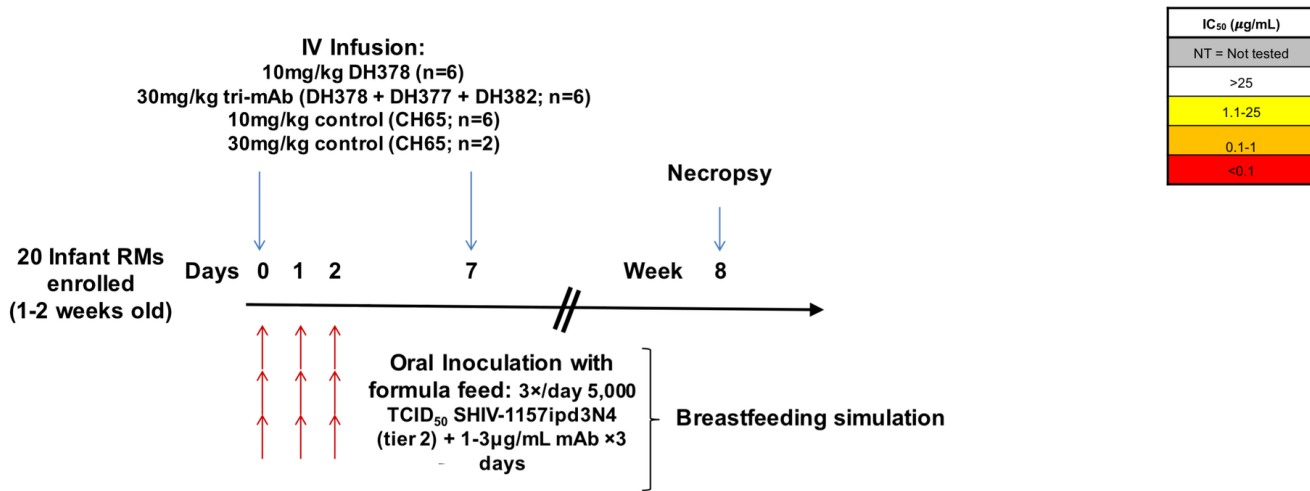

**Figure 2**

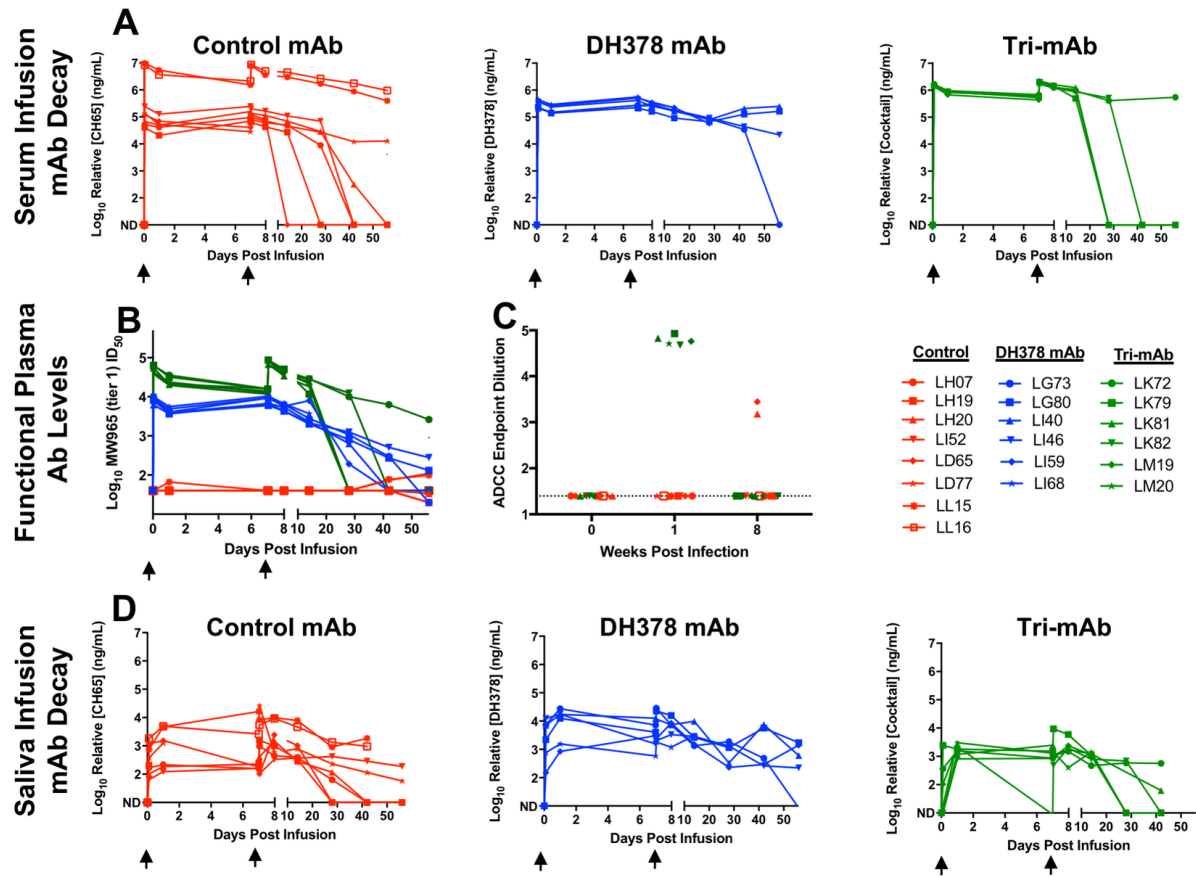



**Figure 3**

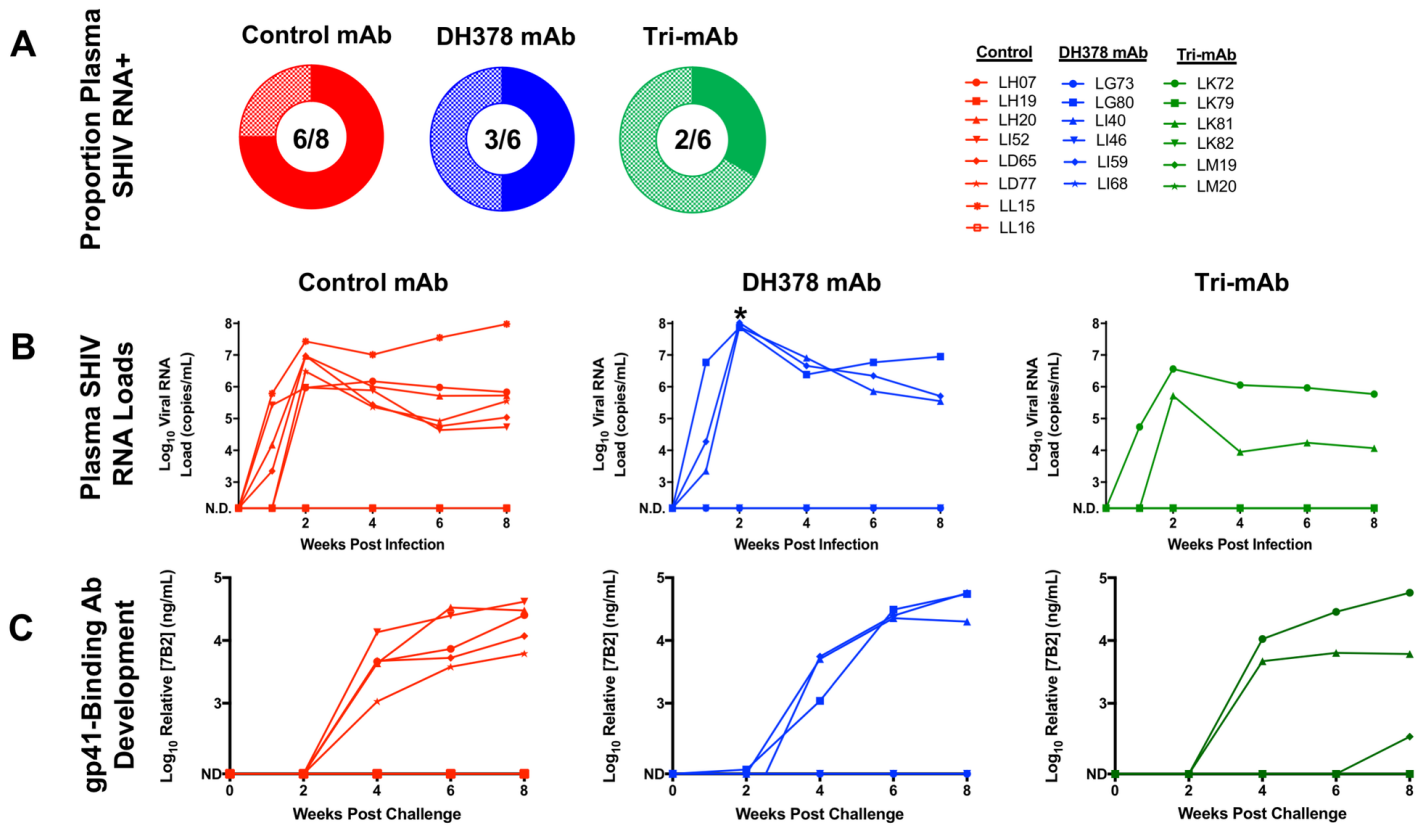

## Figure 4

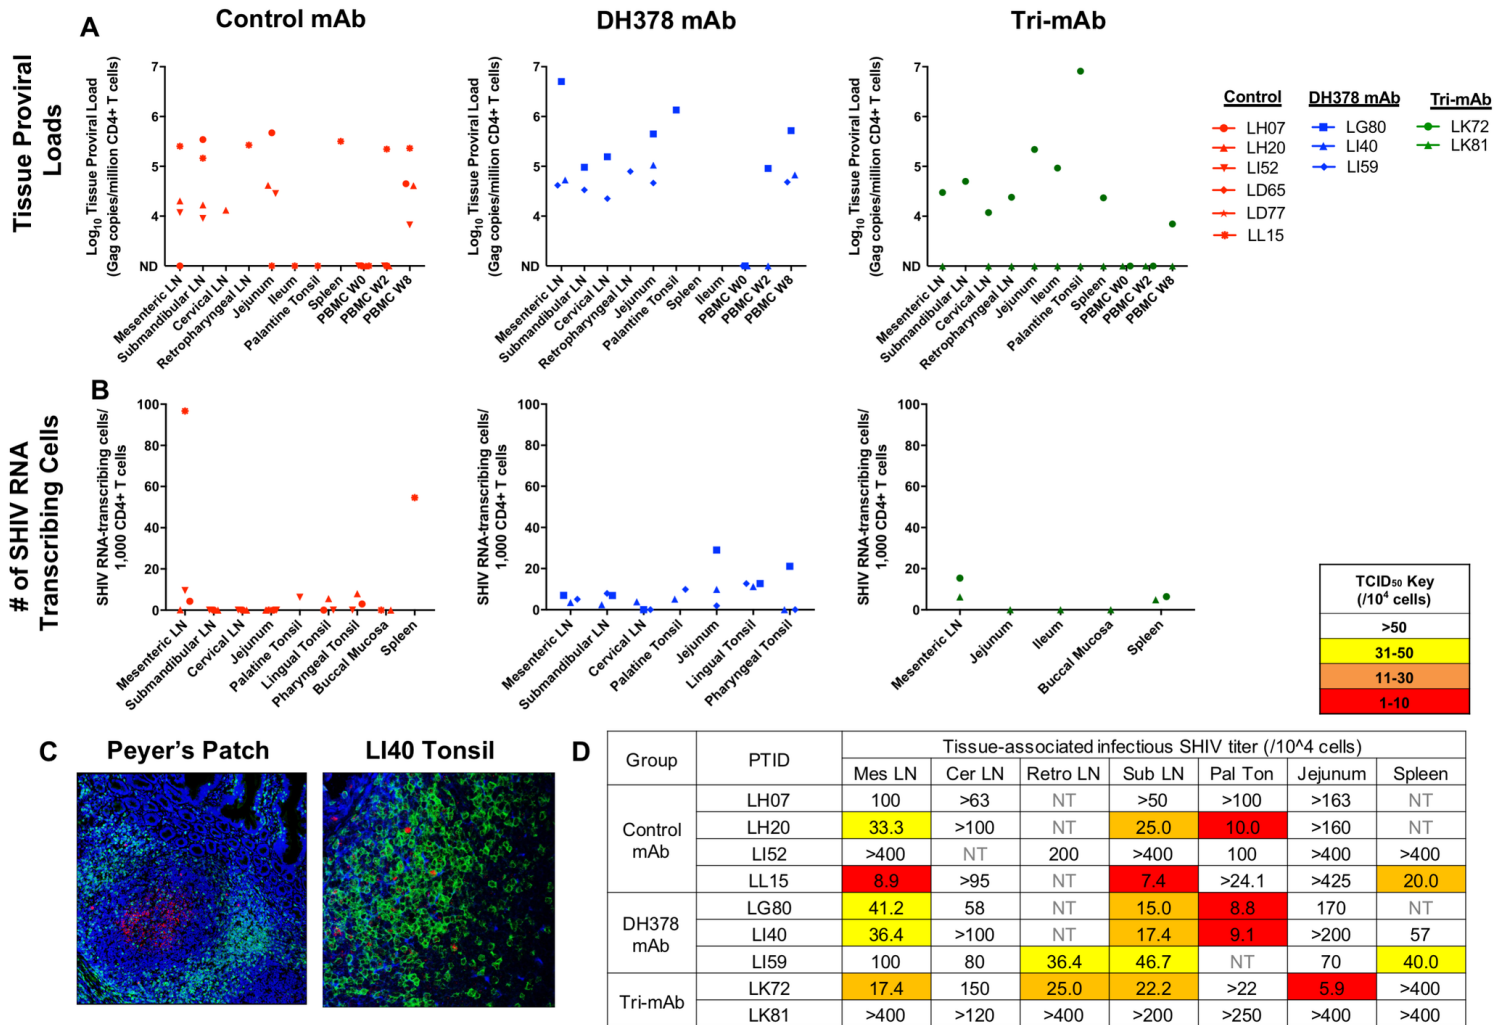

## Figure 5

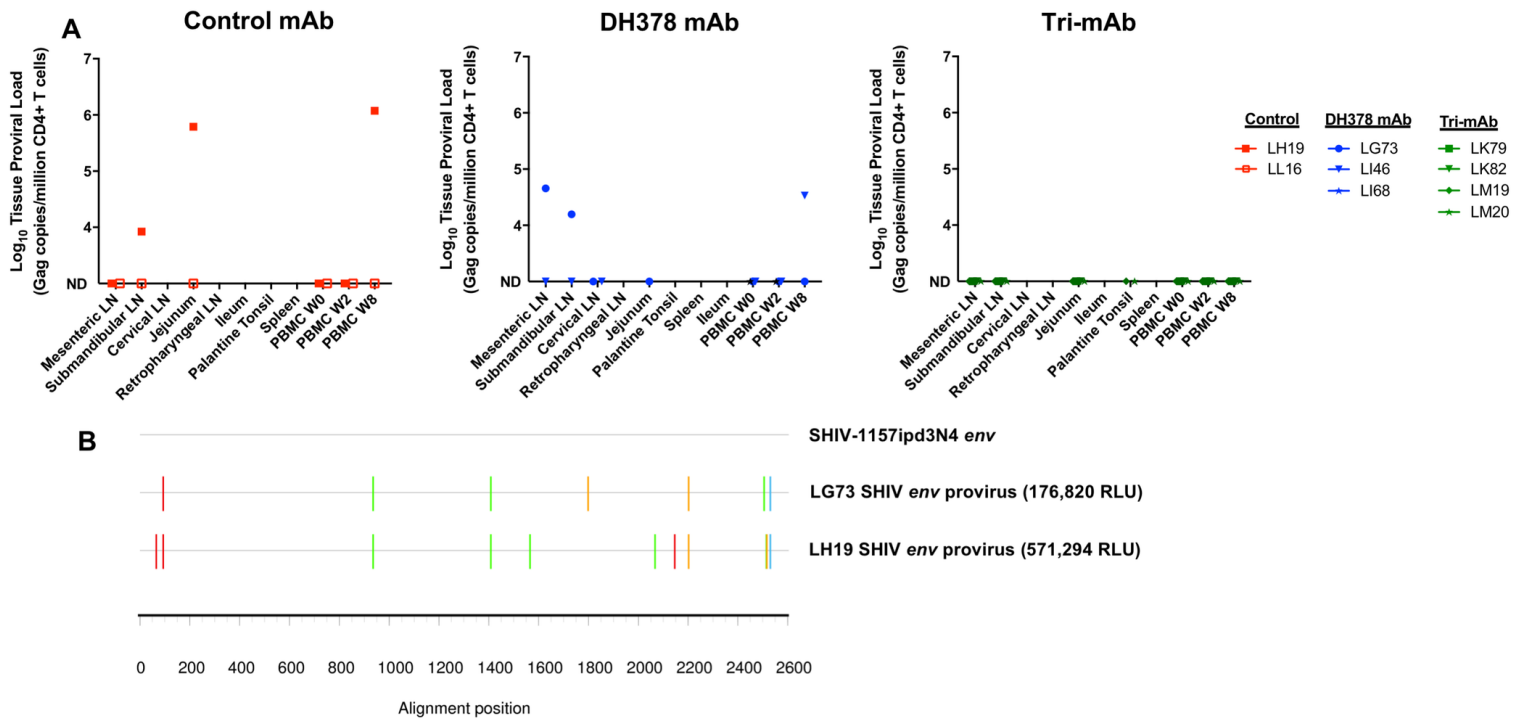

Source: http://www.biorxiv.org/content/biorxiv/early/2017/06/03/145524.full.pdf
